# Supplementary material for: Competitive fitness of Pseudomonas aeruginosa isolates in human and murine precision-cut lung slices
Source: PubMed Central journal article supplement (PMC9446154; doi:10.3389/fcimb.2022.992214), 2022-08-23

## Supplementary dataset E2

### Read me:

This dataset is intended to explain the two different forms of presentation of the competition results to the reader. In order to present all results in a complex manner on one page, a highly condensed version was chosen in the manuscript with the help of Figures 2 and 3. On the following slides, all courses are shown again in both display forms at a larger resolution and with axes and legends. On the first slide, the first form of representation (Figure 2) is shown and explained using the example of course A. It shows the relative changes after 4h and after 8h in relation to the 0h point in time. Slide 2 shows the representation of the relative growth proportions of each serial isolate over the competition period, exemplarily for course A. Both forms of representation are then shown individually for all courses on the following slides. Both biological replicates and the results in mPCLS and hPCLS are shown next to each other on the same slide.

**Example for the graphical representation of the outcome of the competitive fitness experiments**

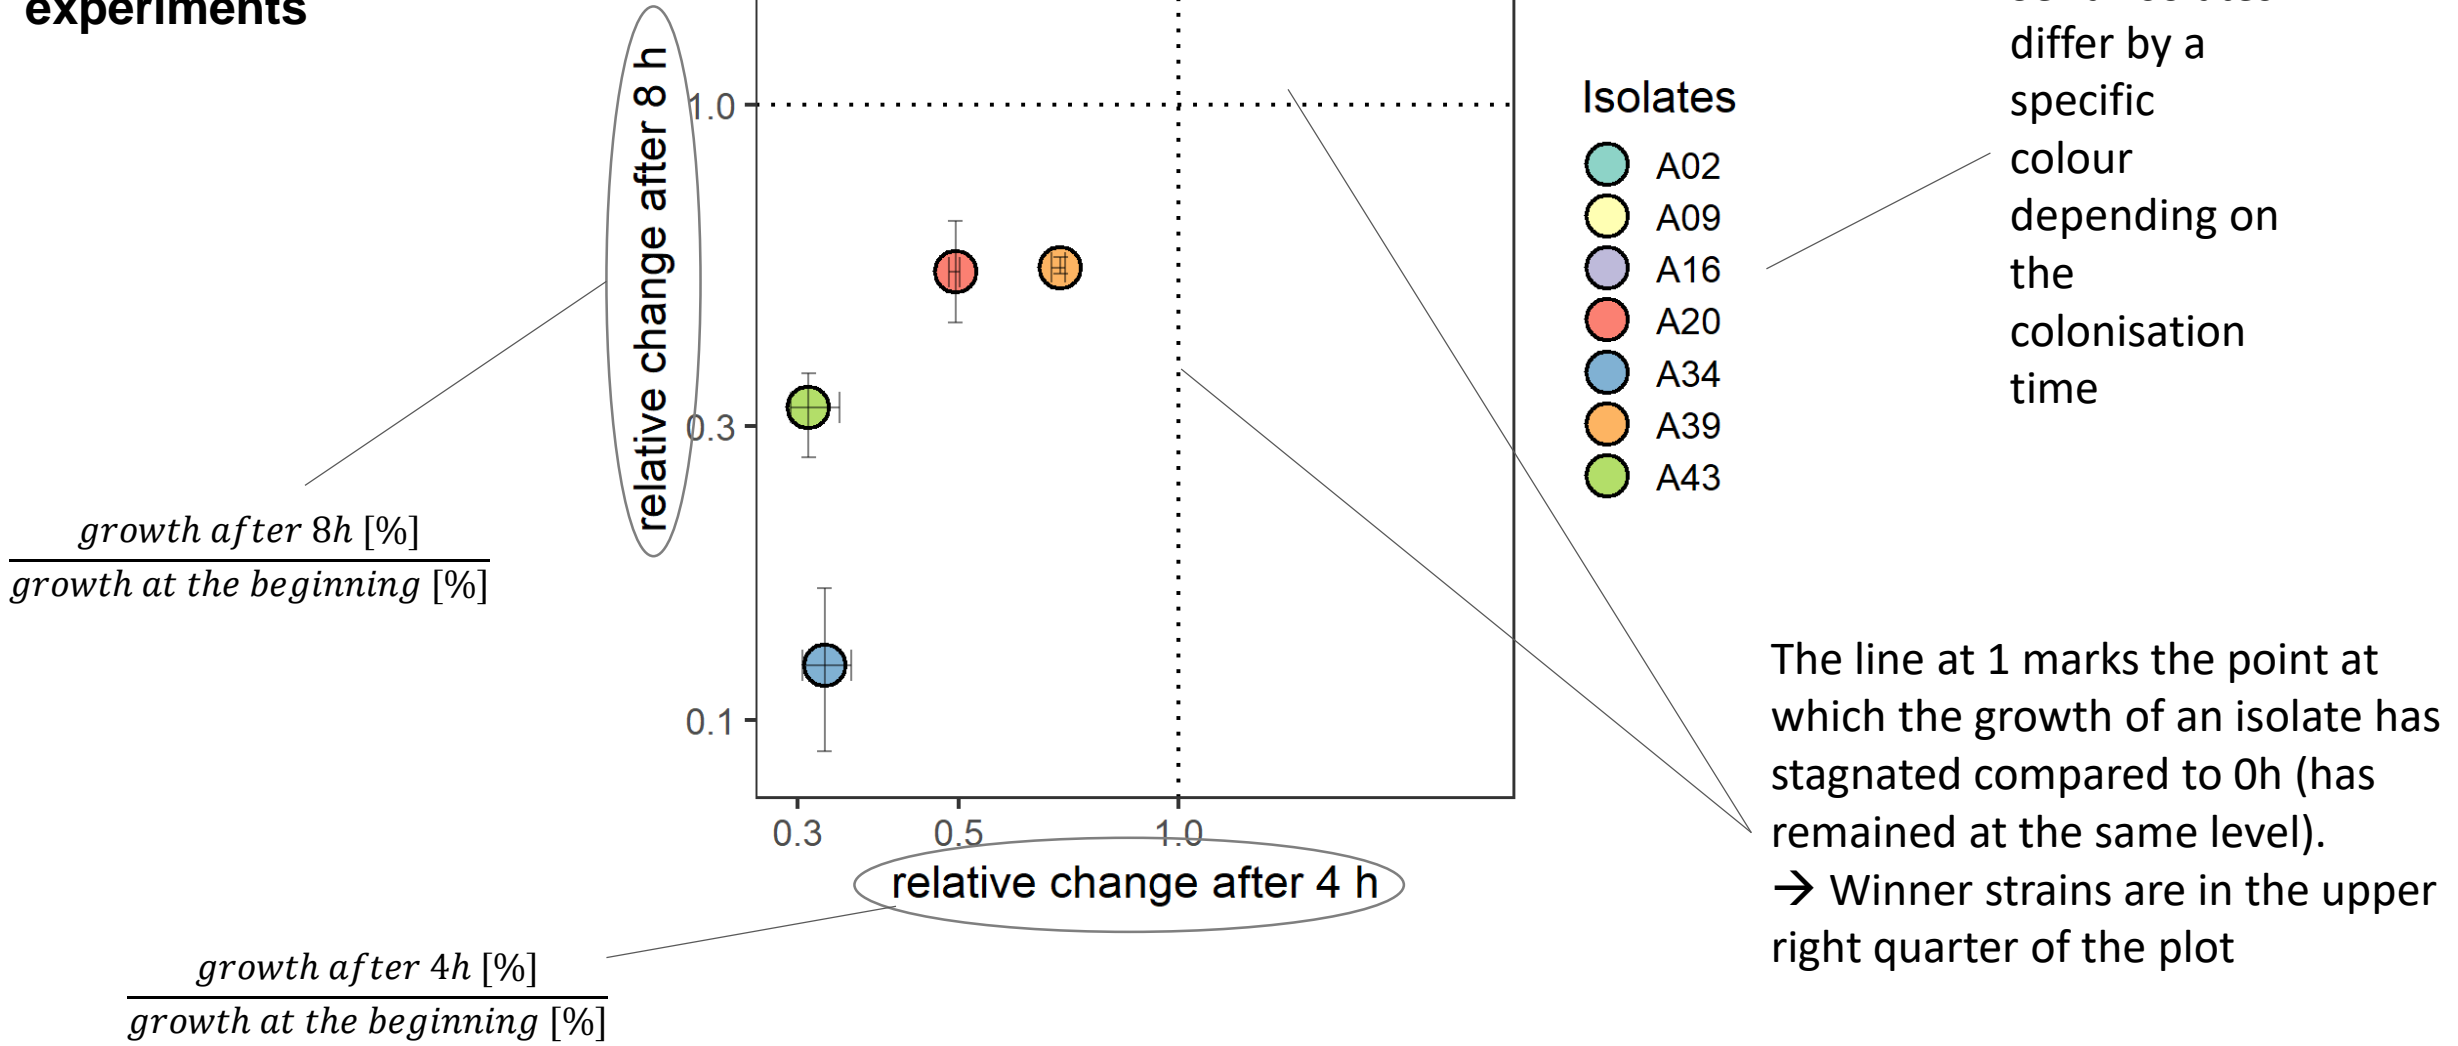

**Example for the graphical representation of the relative proportions of serial isolates during competitive growth**

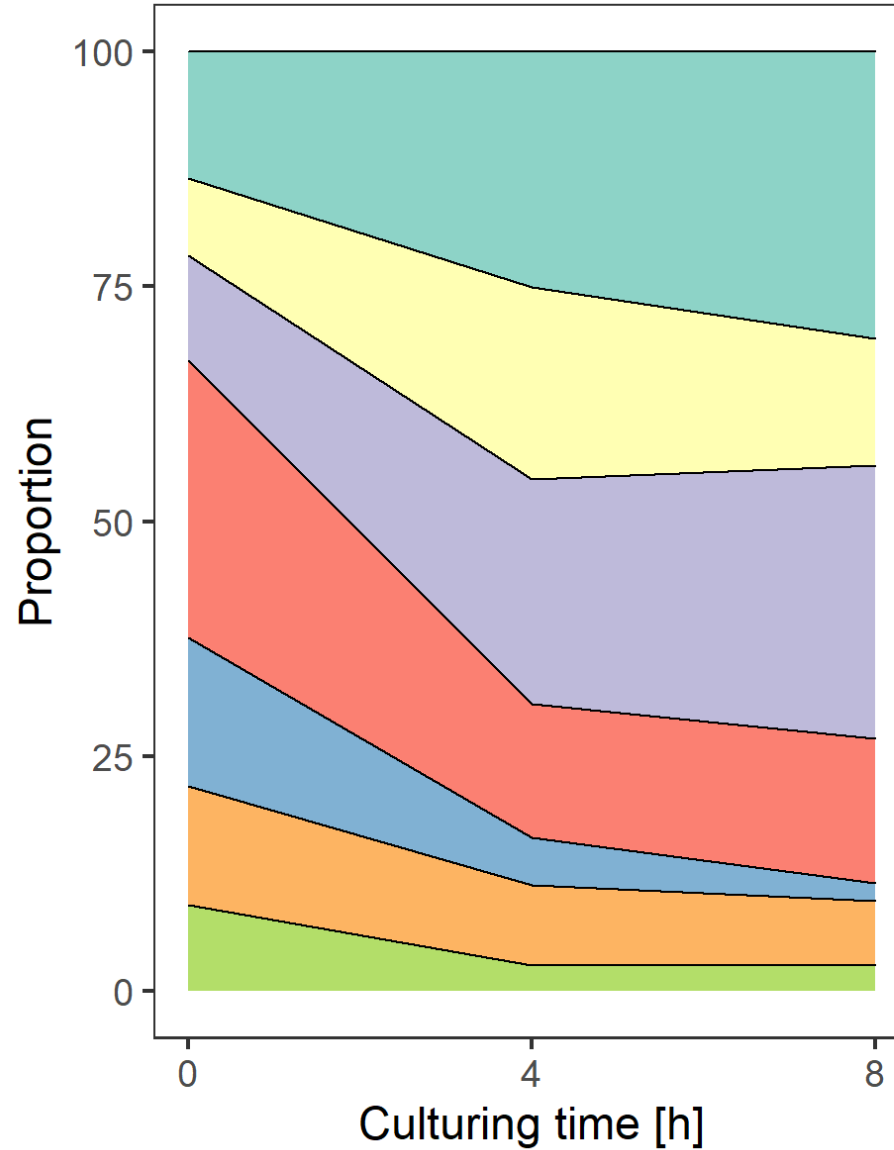

**Isolates**

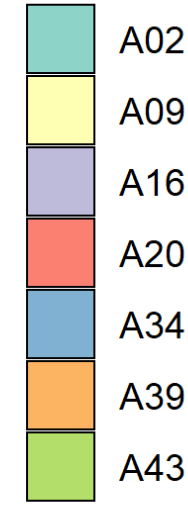

Proportion of each serial isolate; sum of isolates were normalized to 100%

Serial isolates differ by a specific colour depending on the colonisation time

Samples were taken after 4h and 8h of competitive growth

# Course A

## human

1<sup>st</sup> replicate

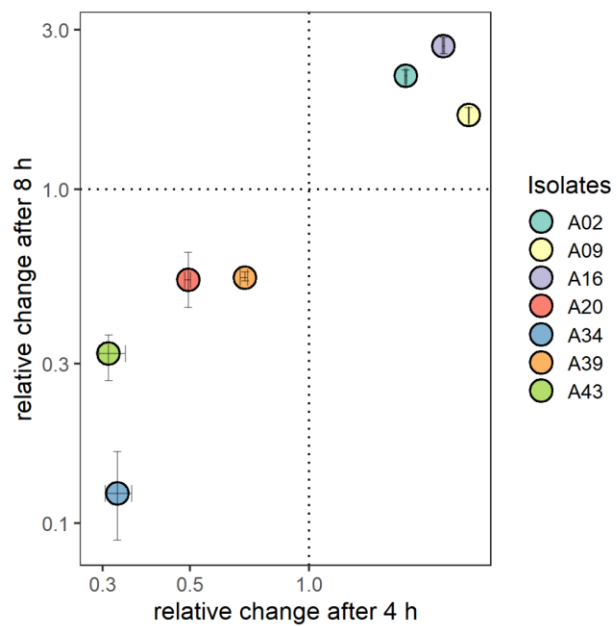

## murine

2<sup>nd</sup> replicate

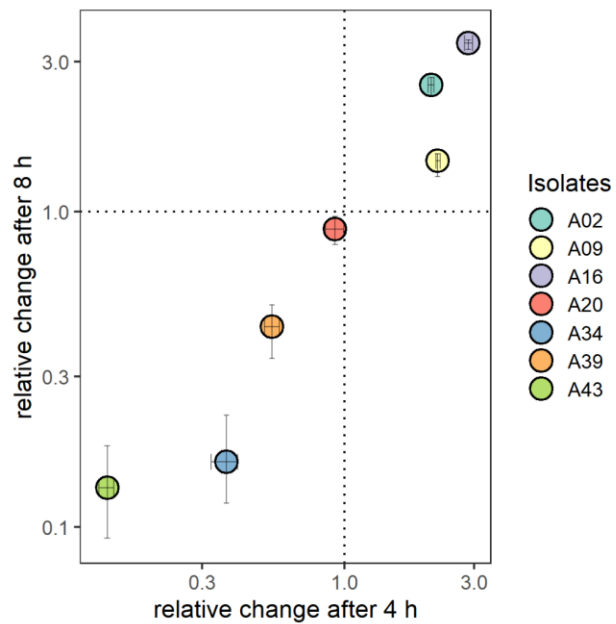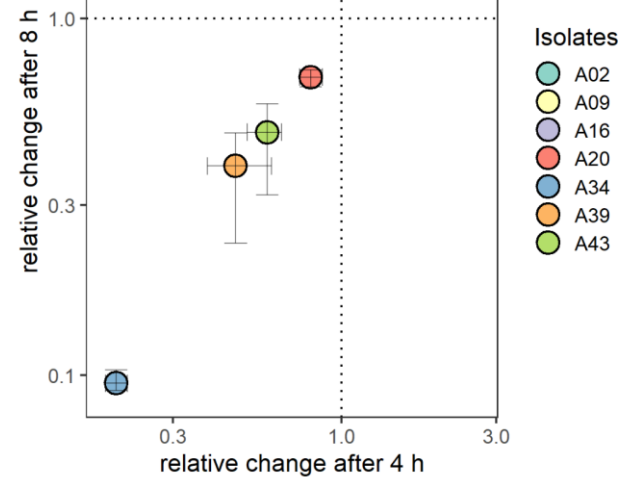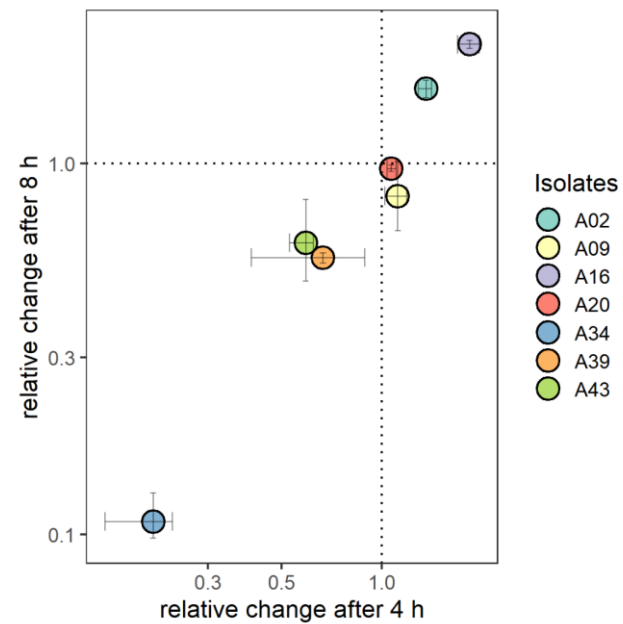

# Course B

## human

## murine

1<sup>st</sup> replicate

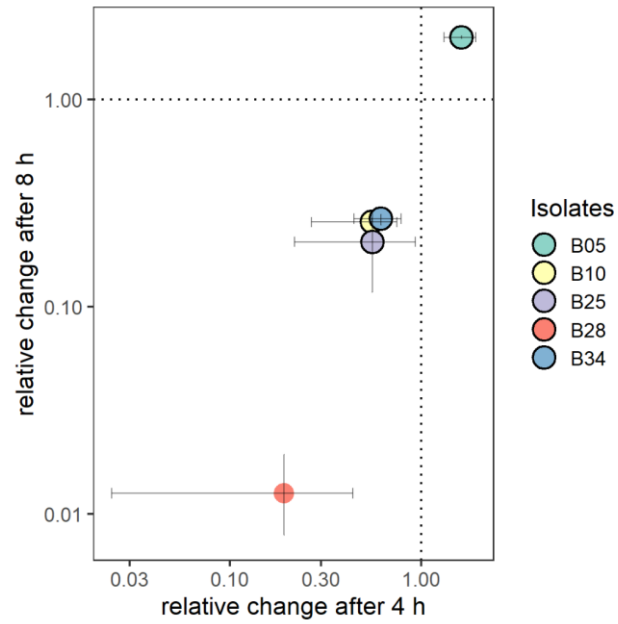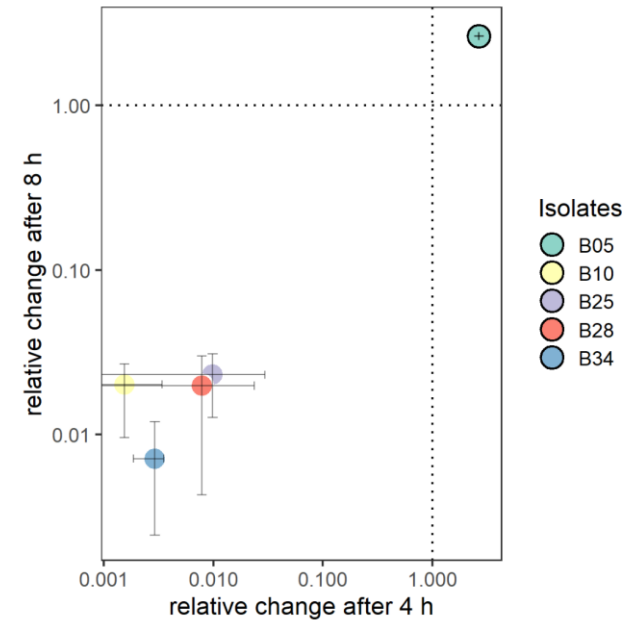

2<sup>nd</sup> replicate

The second biological replicate of course B was removed from the further statistical calculation / evaluation as well as for the graphic representation of the results, since only 4 isolates corresponded past the quality control.

# Course C

## human

1<sup>st</sup> replicate

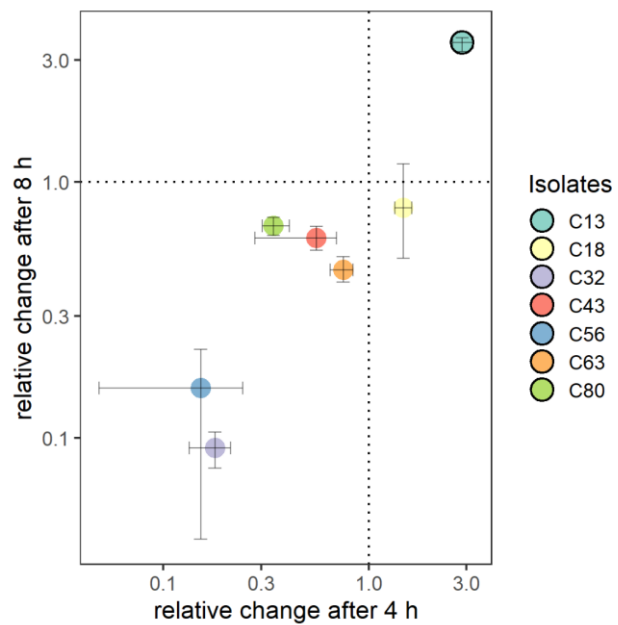

2<sup>nd</sup> replicate

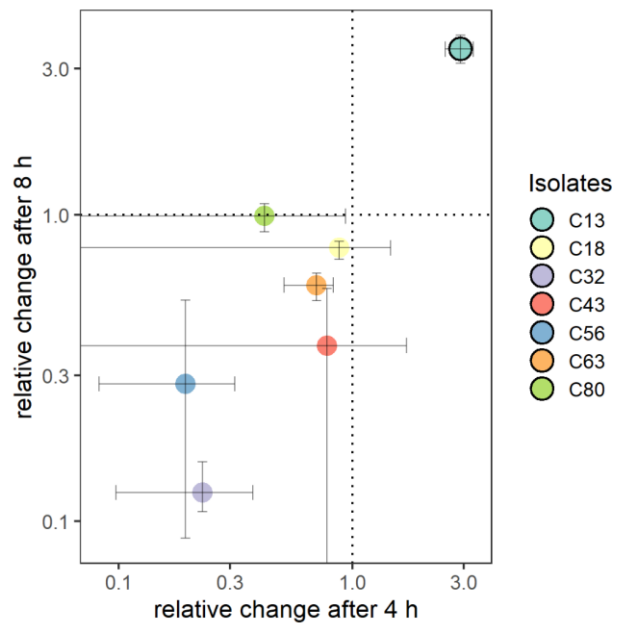

## murine

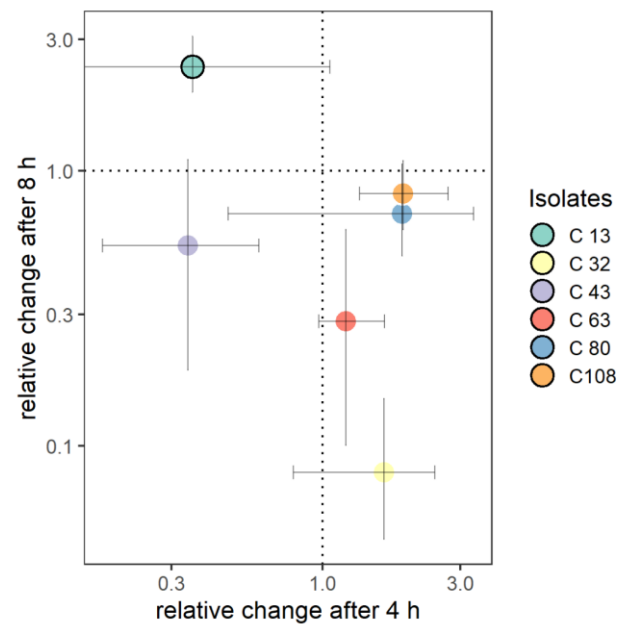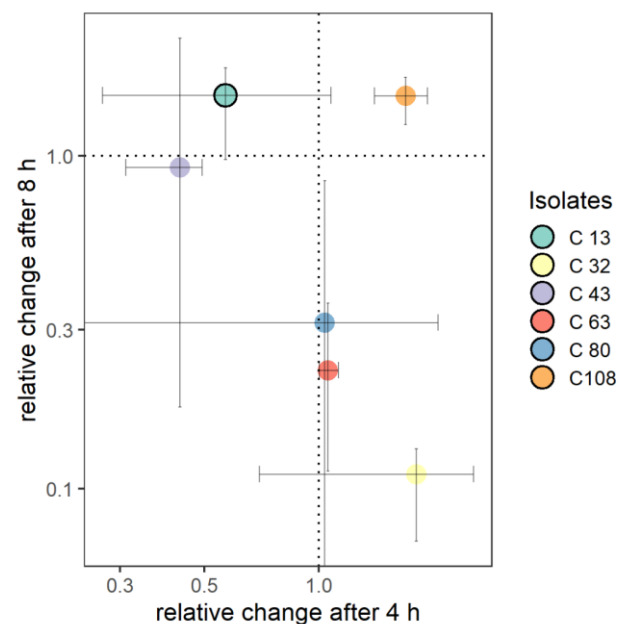

# Course D

## human

1<sup>st</sup> replicate

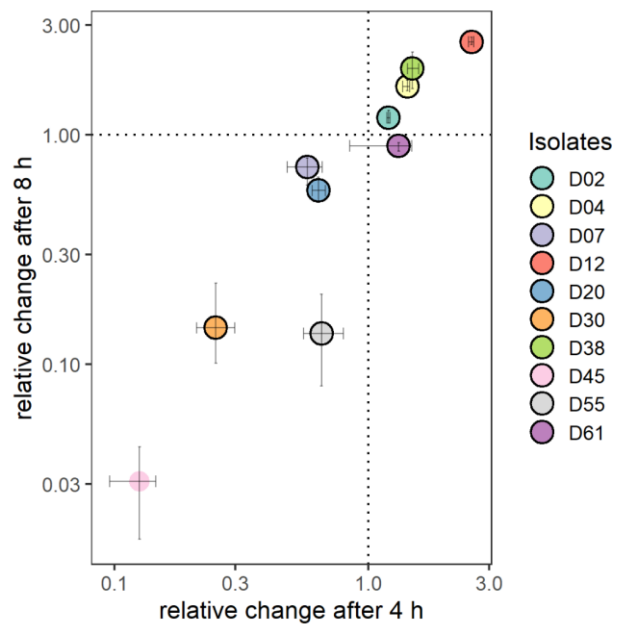

## murine

relative change after 8 h

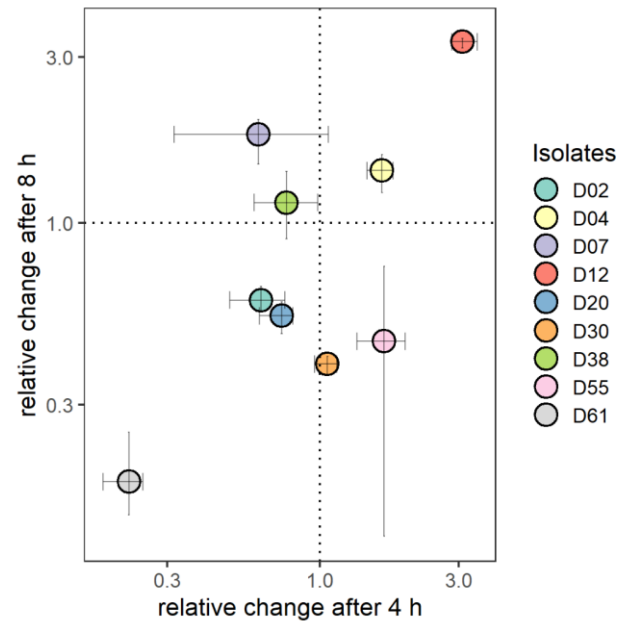

2<sup>nd</sup> replicate

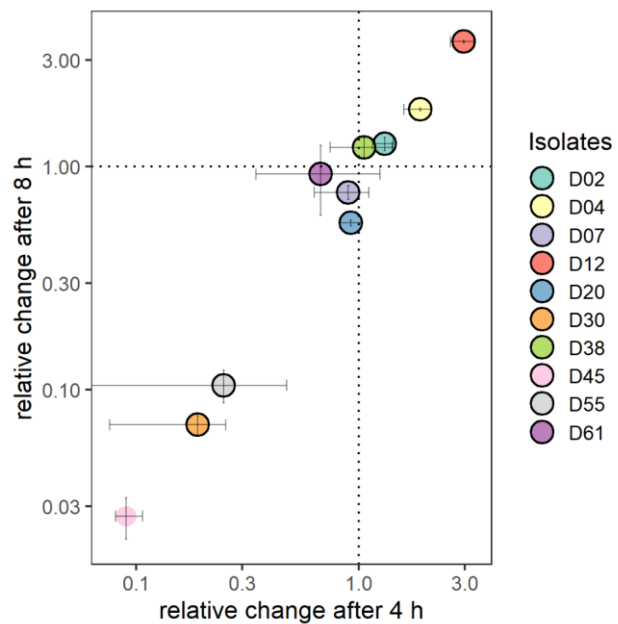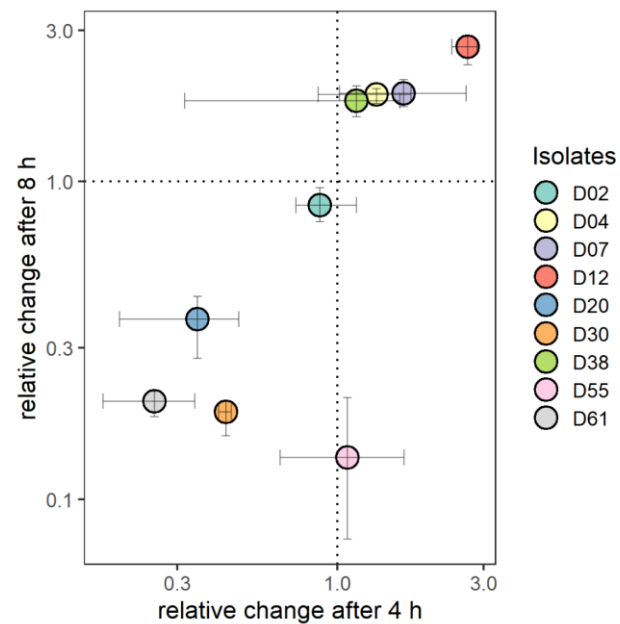

# Course E

## human

1<sup>st</sup> replicate

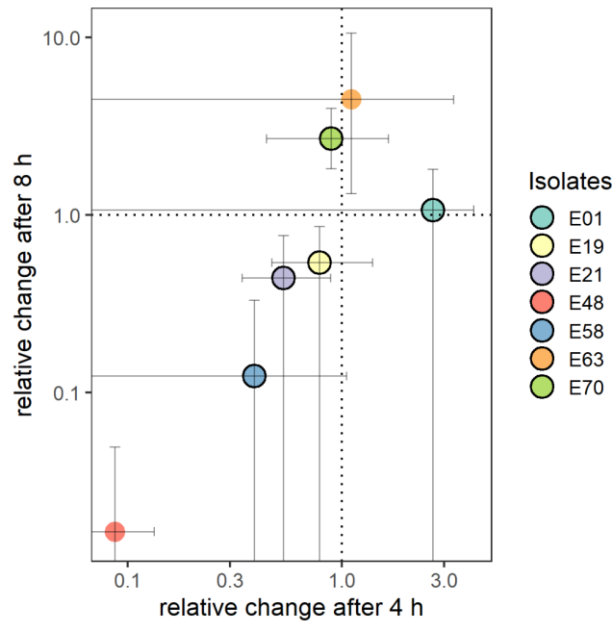

2<sup>nd</sup> replicate

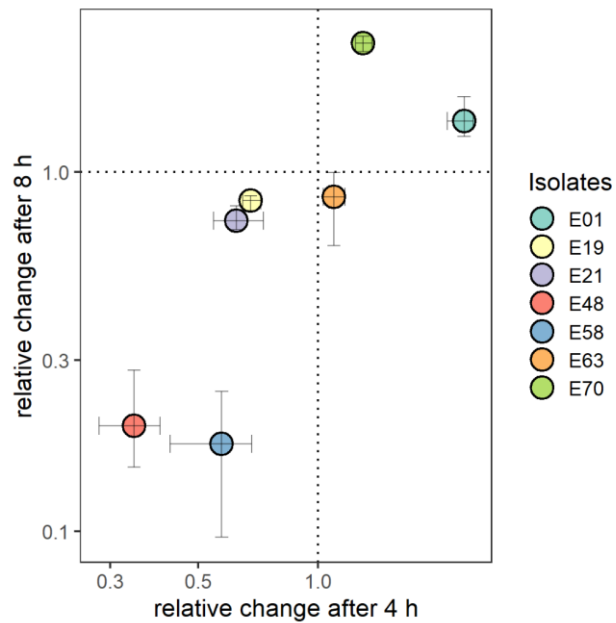

## murine

relative change after 8 h

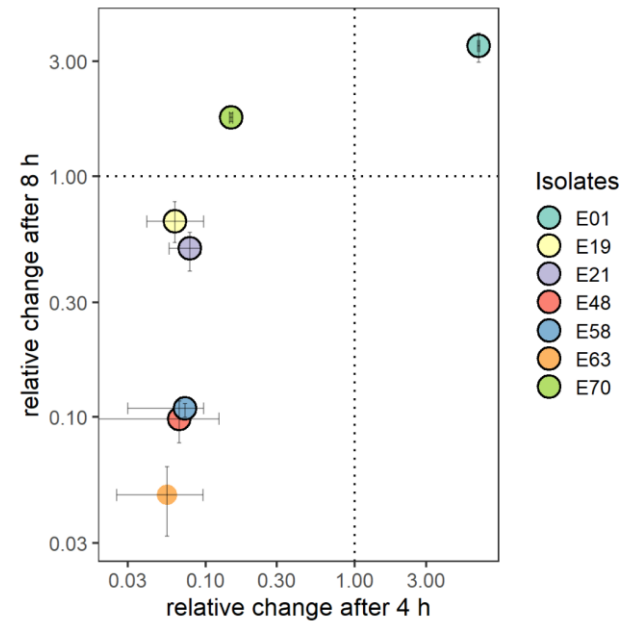

relative change after 8 h

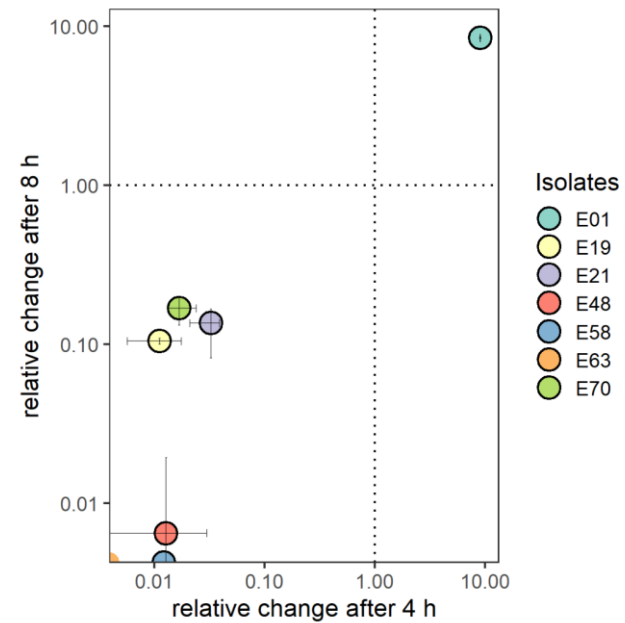



Course F

human

murine

1<sup>st</sup> replicate

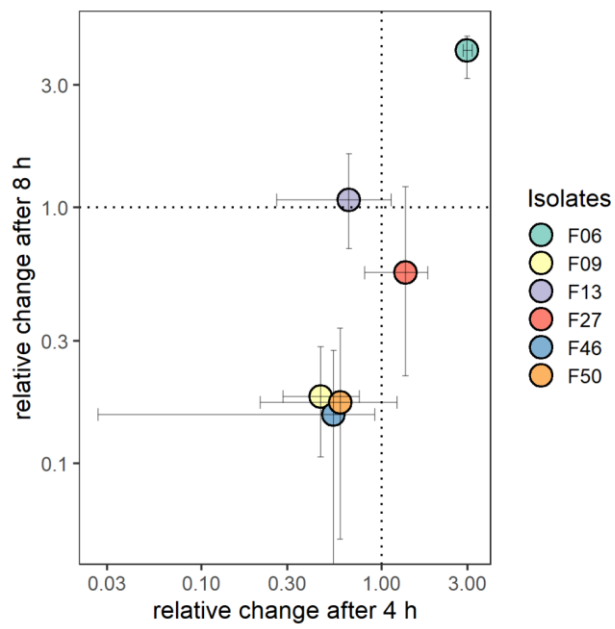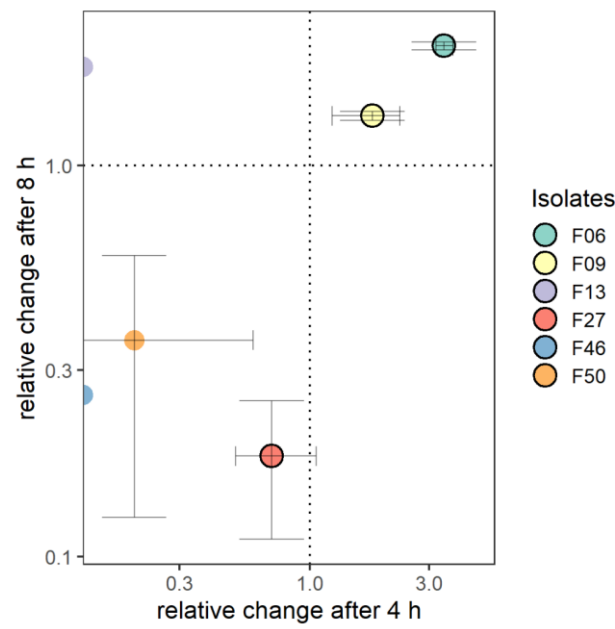

2<sup>nd</sup> replicate

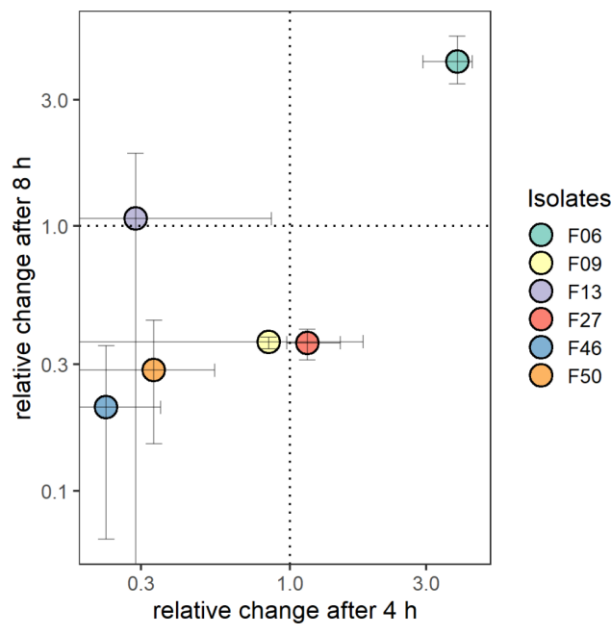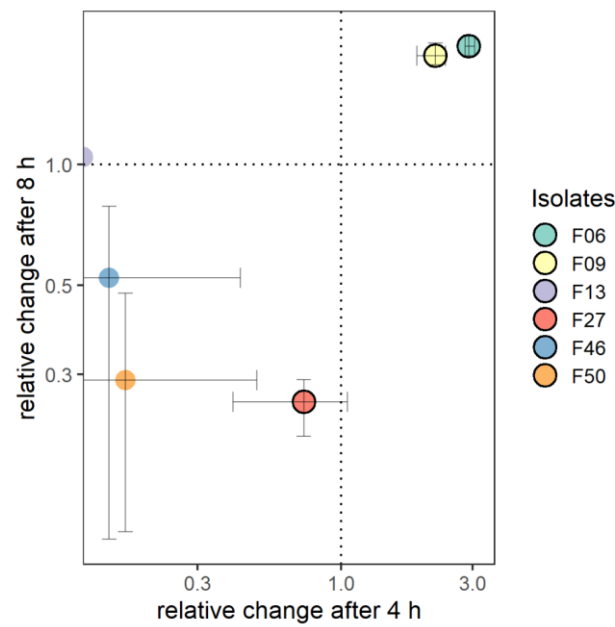

Course G

human

1<sup>st</sup> replicate

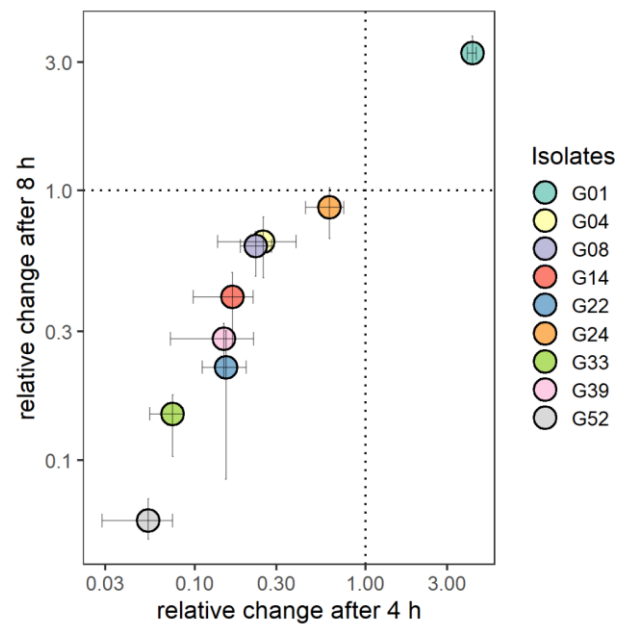

murine

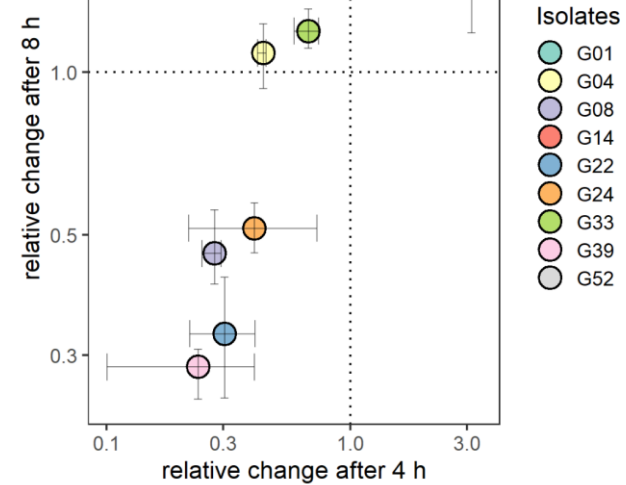

2<sup>nd</sup> replicate

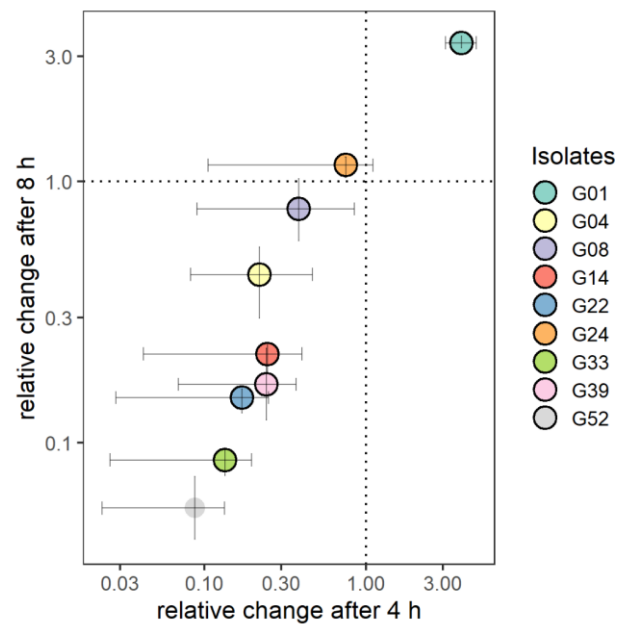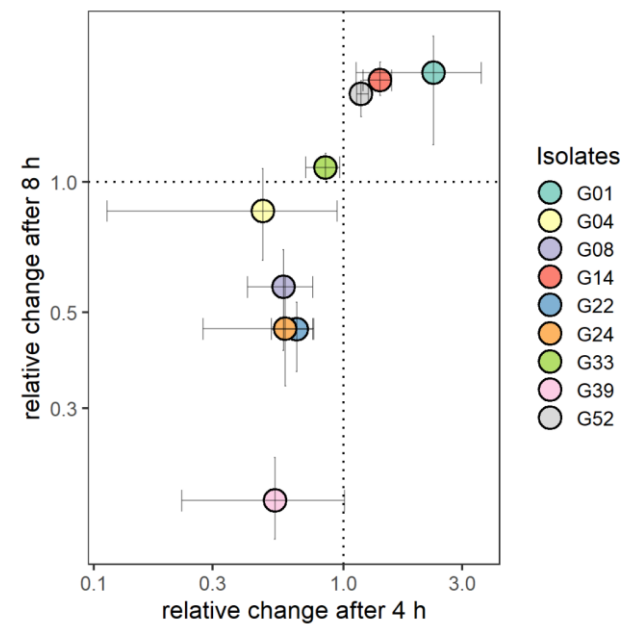

Course H

human

murine

1<sup>st</sup> replicate

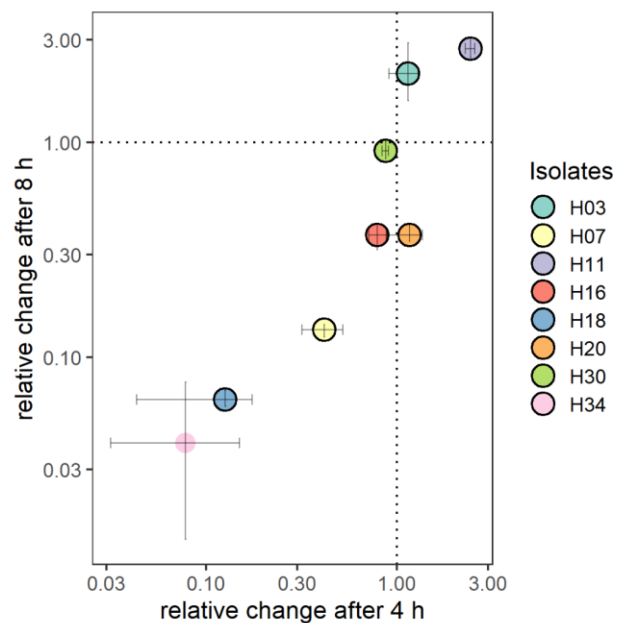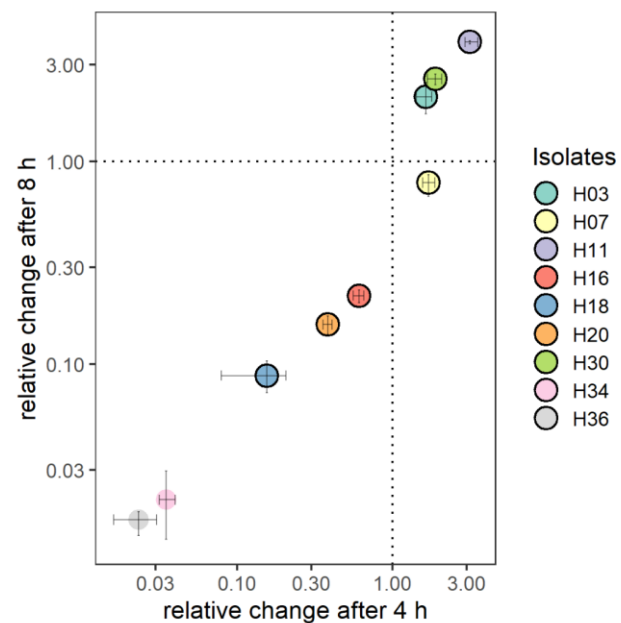

2<sup>nd</sup> replicate

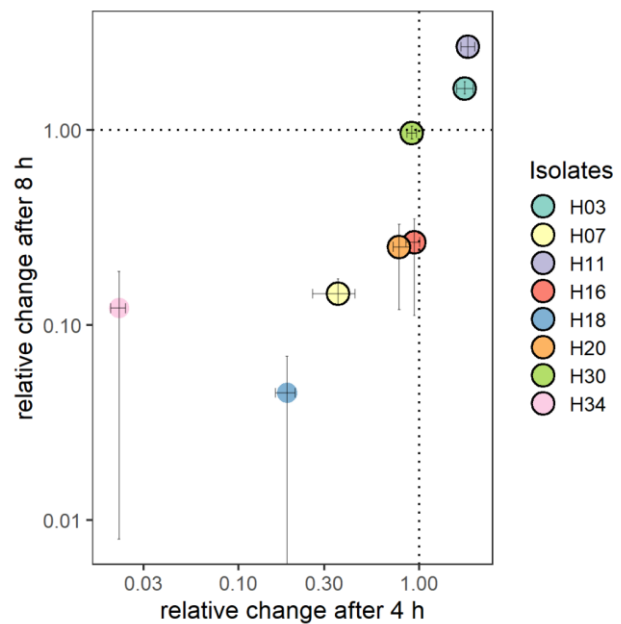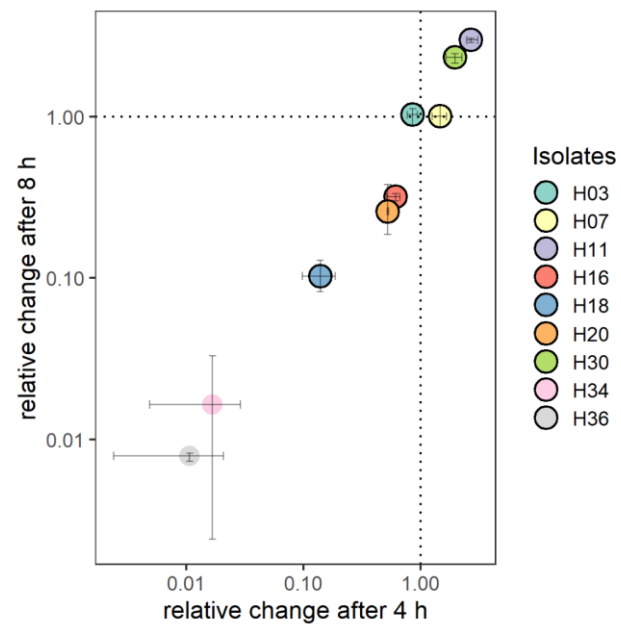

Course K

human

1<sup>st</sup> replicate

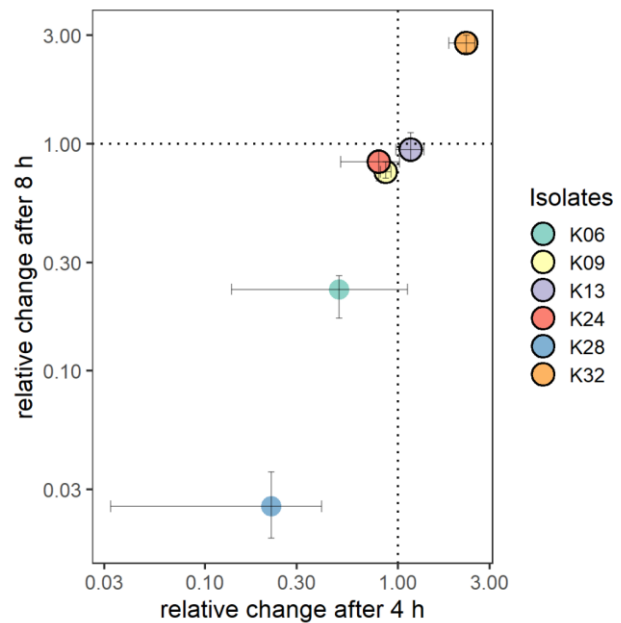

murine

relative change after 8 h

relative change after 4 h

Isolates

- K06
- K09
- K13
- K24
- K28
- K32

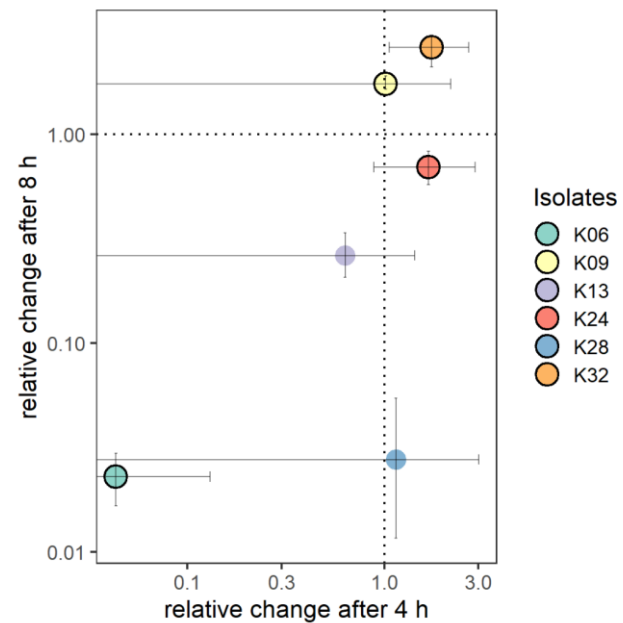

2<sup>nd</sup> replicate

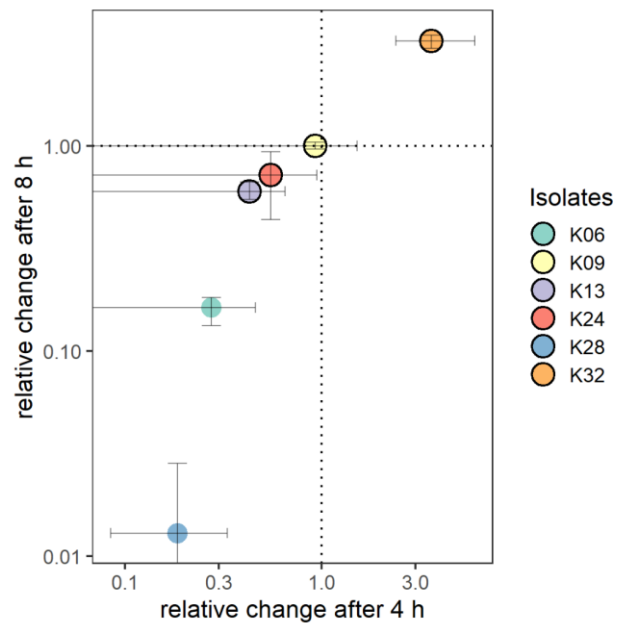

relative change after 8 h

relative change after 4 h

Isolates

- K06
- K09
- K13
- K24
- K28
- K32

# Course L

## human

1<sup>st</sup> replicate

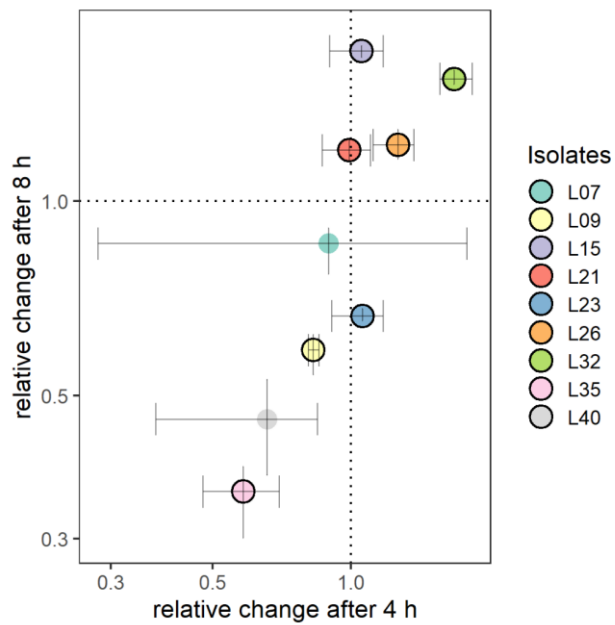

## murine

2<sup>nd</sup> replicate

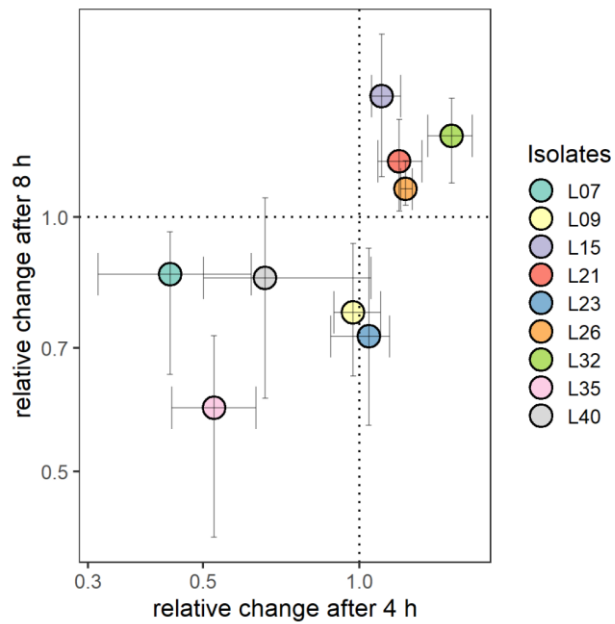

1<sup>st</sup> replicate

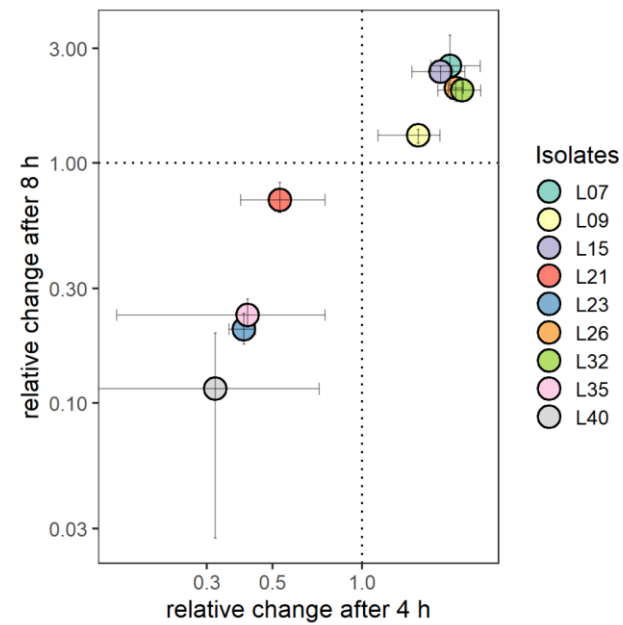

2<sup>nd</sup> replicate

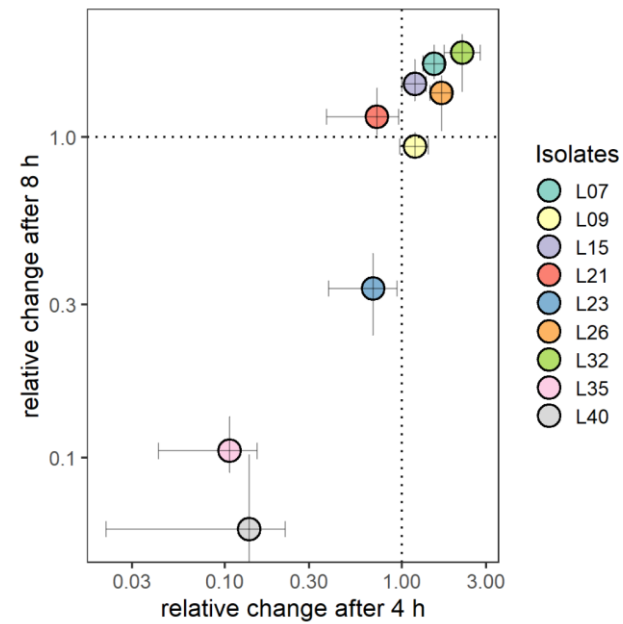

# Course M

## human

1<sup>st</sup> replicate

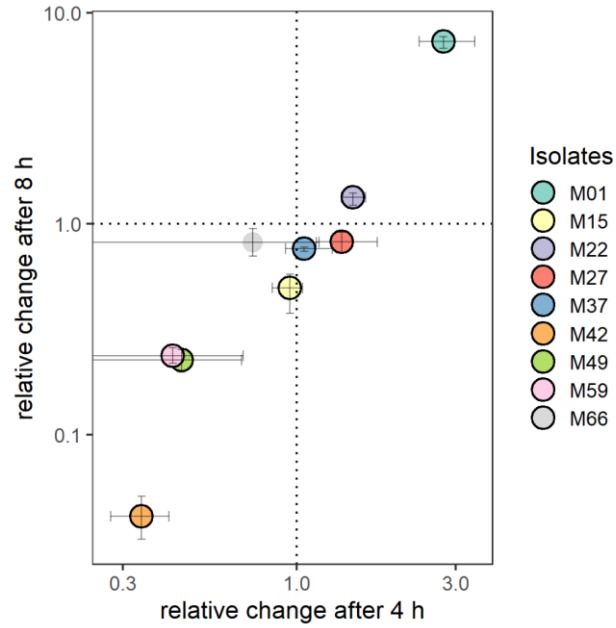

## murine

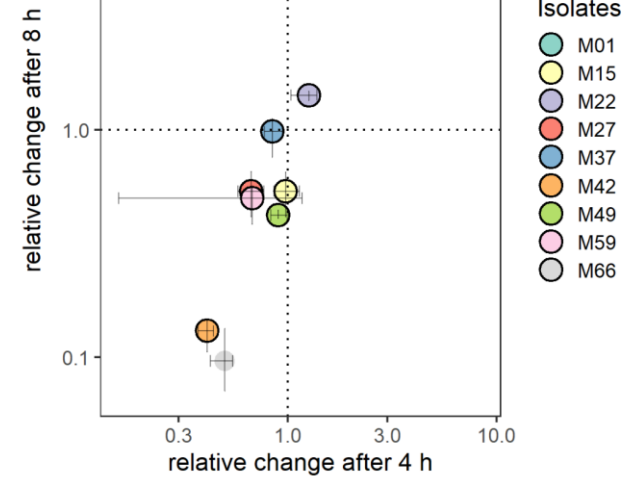

2<sup>nd</sup> replicate

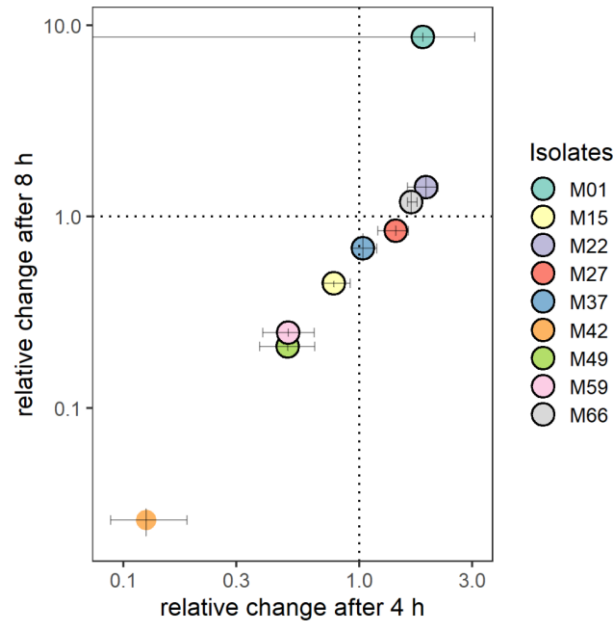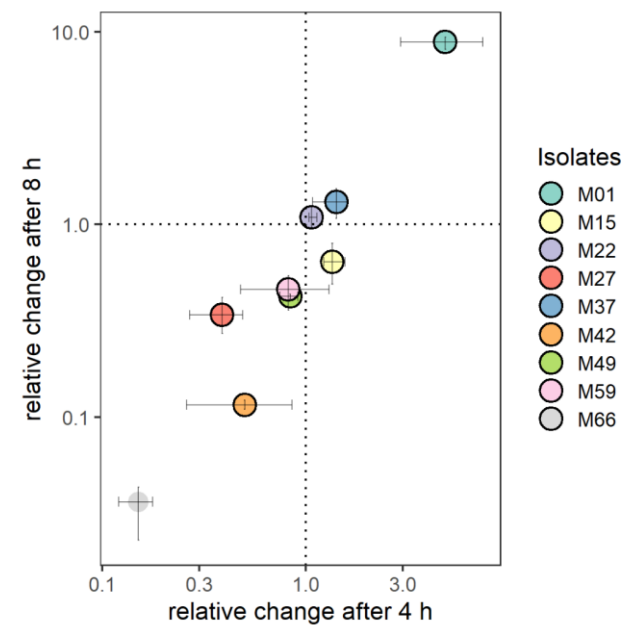

Course N

human

murine

1<sup>st</sup> replicate

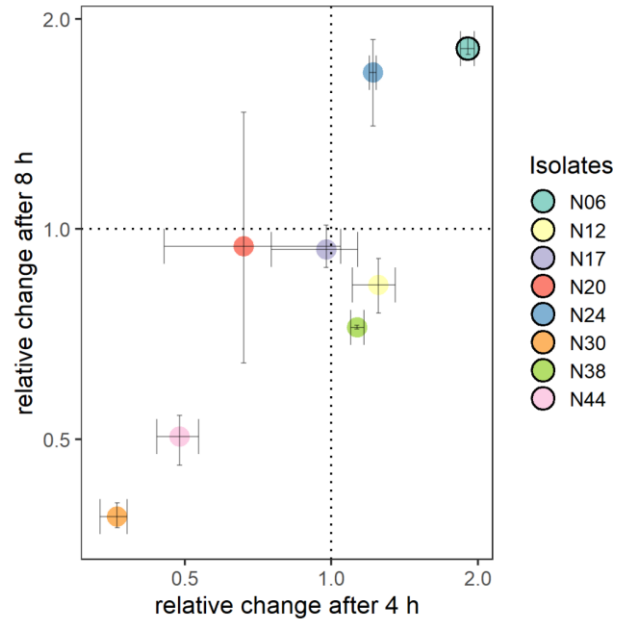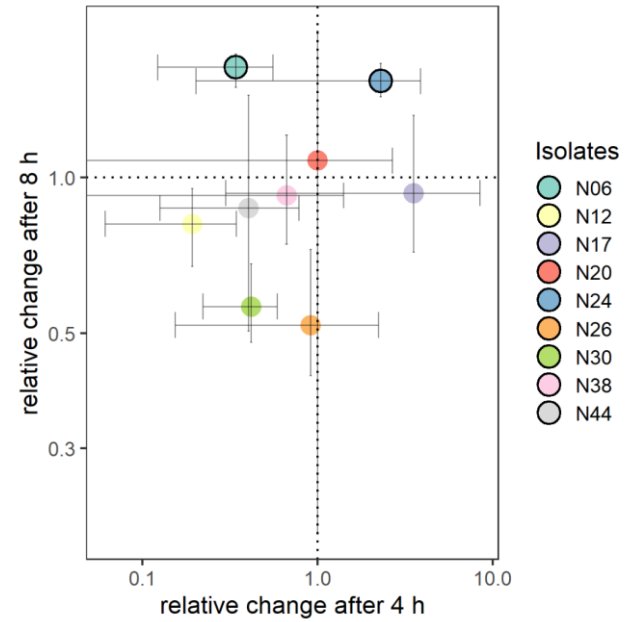

2<sup>nd</sup> replicate

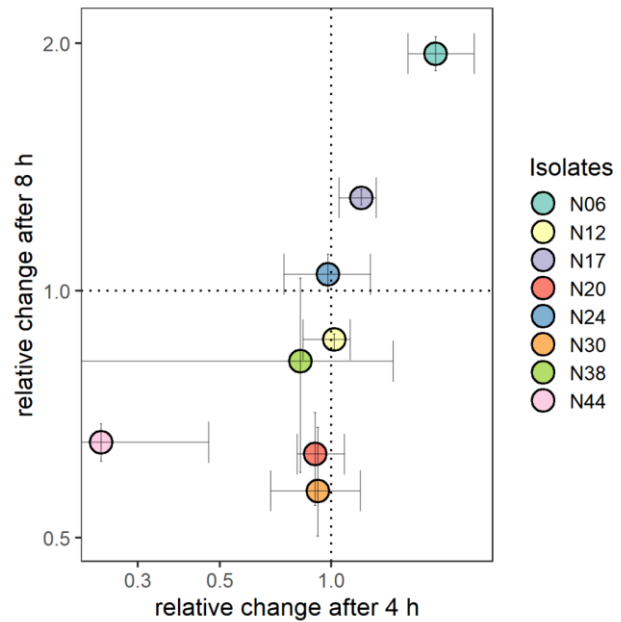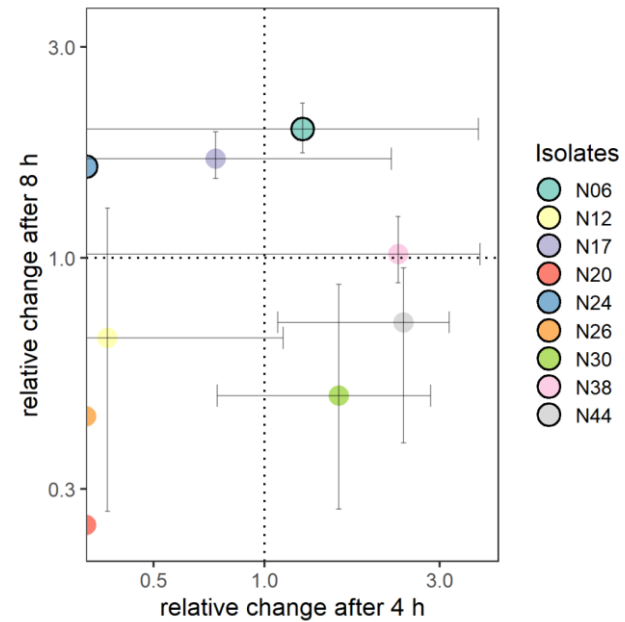

# Course A

## human

## murine

1<sup>st</sup> replicate

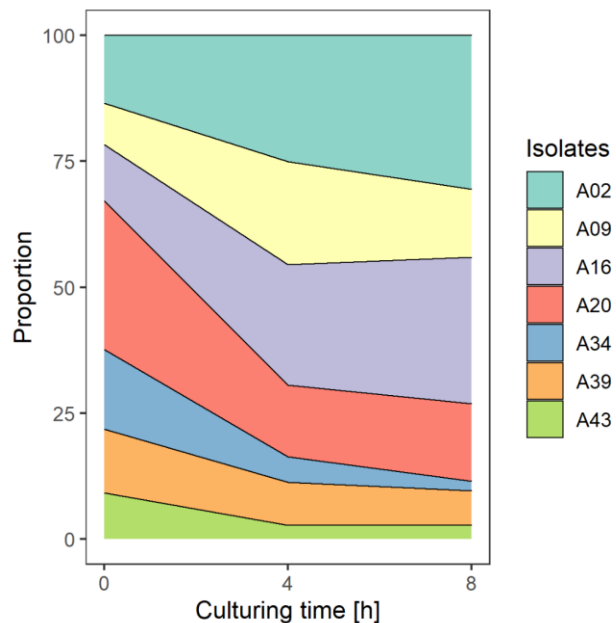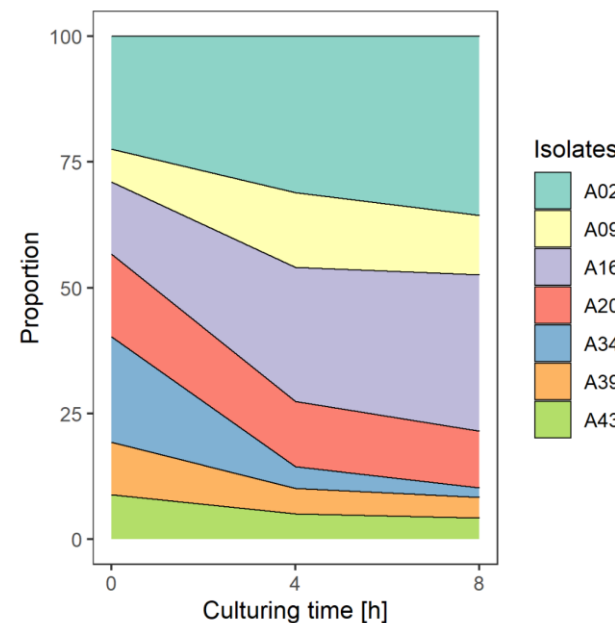

2<sup>nd</sup> replicate

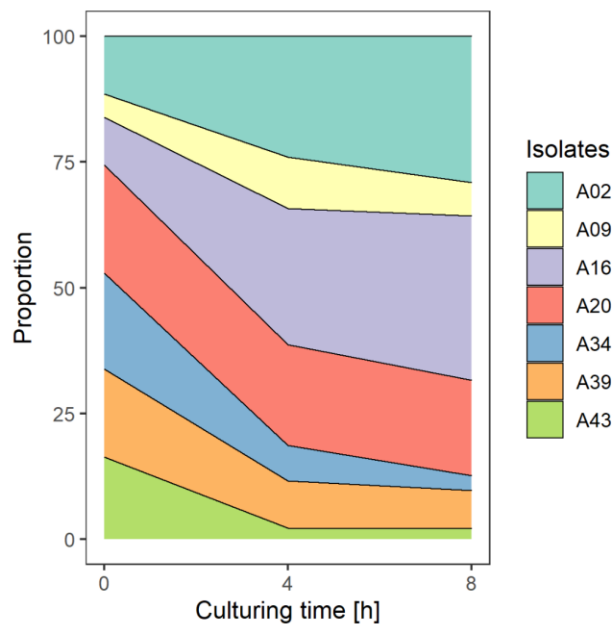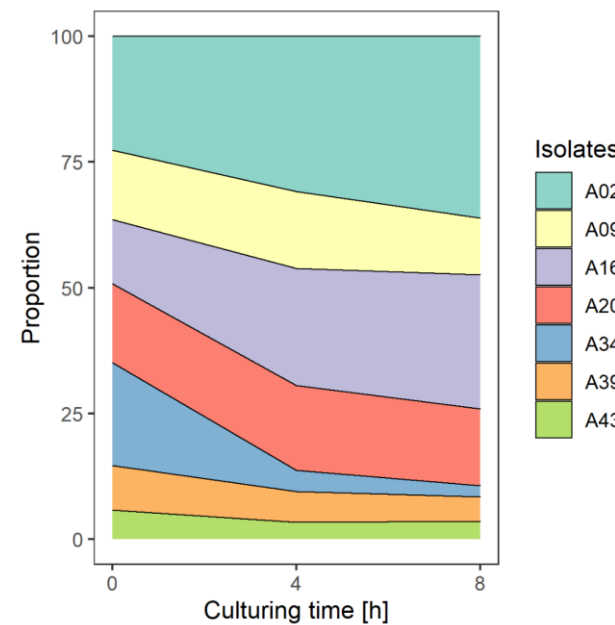



## Course B

### human

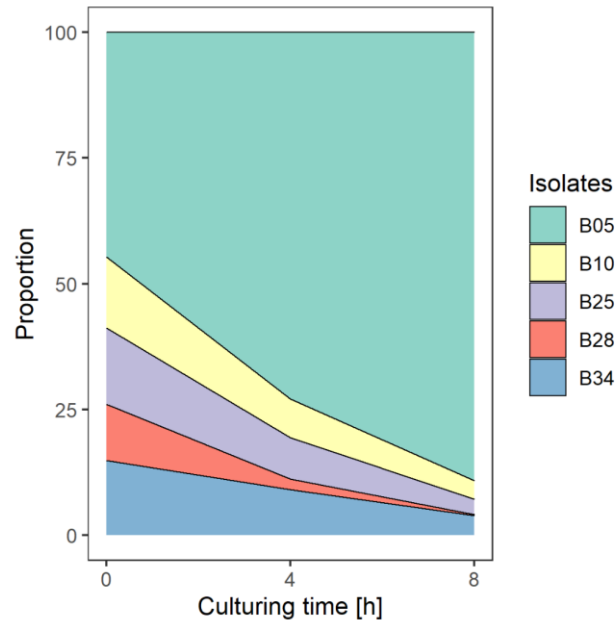

### murine

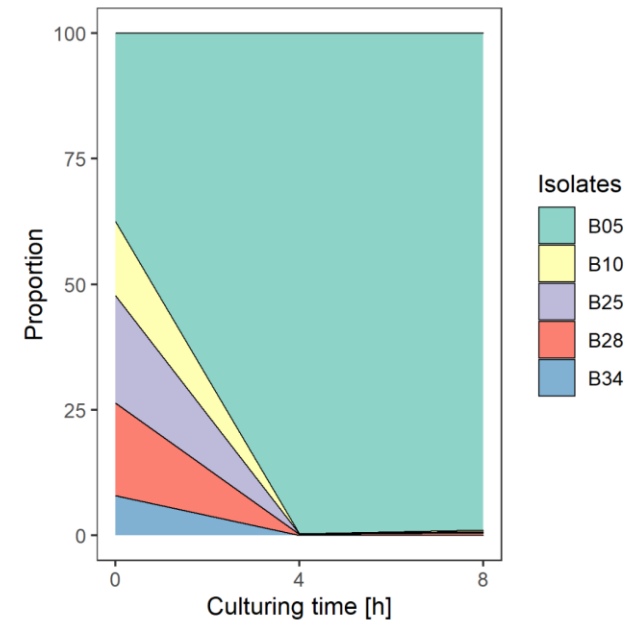

1<sup>st</sup> replicate

2<sup>nd</sup> replicate

The second biological replicate of course B was removed from the further statistical calculation / evaluation as well as for the graphic representation of the results, since only 4 isolates corresponded past the quality control.

# Course C

## human

1<sup>st</sup> replicate

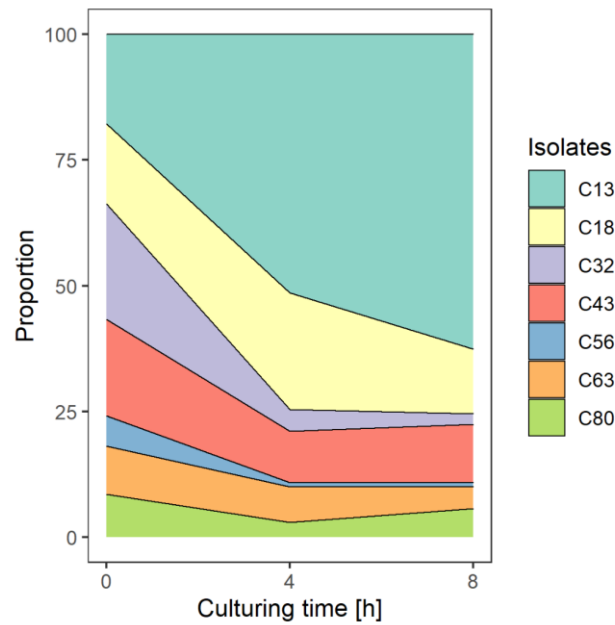

## murine

Proportion

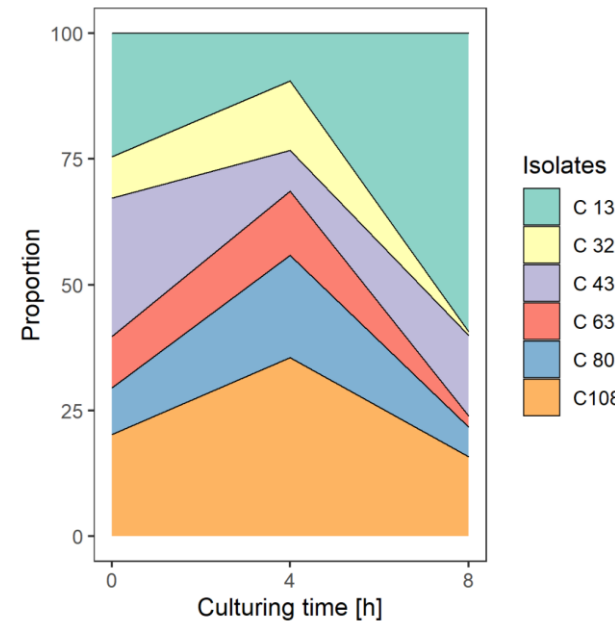

2<sup>nd</sup> replicate

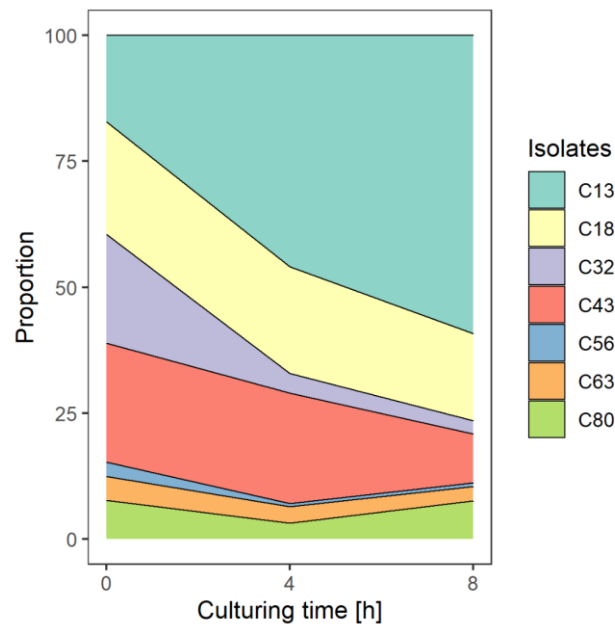

Proportion

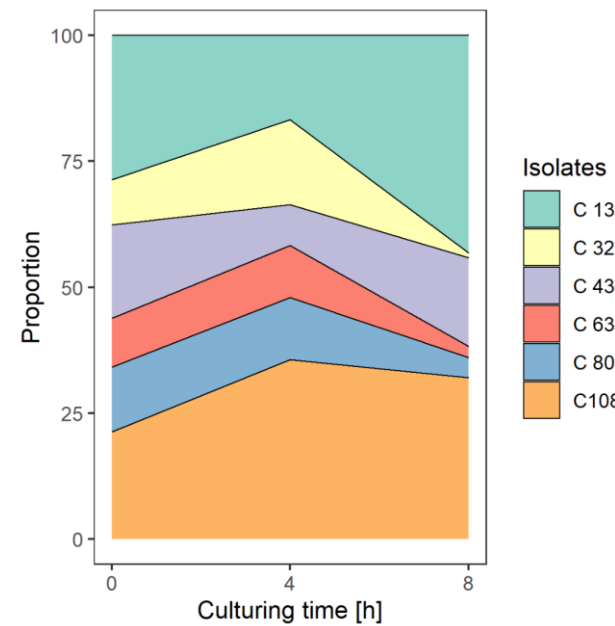

# Course D

## human

1<sup>st</sup> replicate

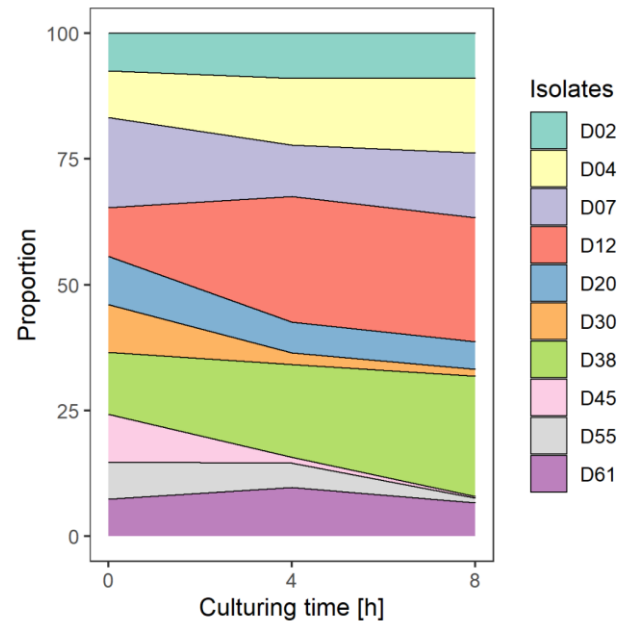

## murine

1<sup>st</sup> replicate

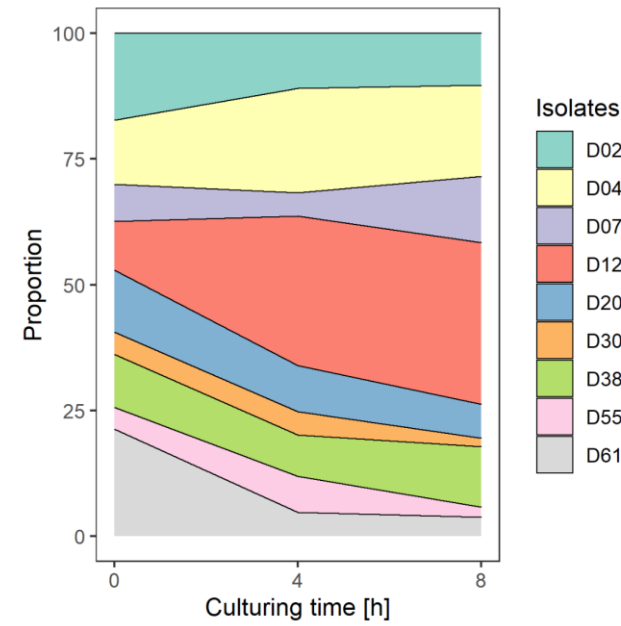

2<sup>nd</sup> replicate

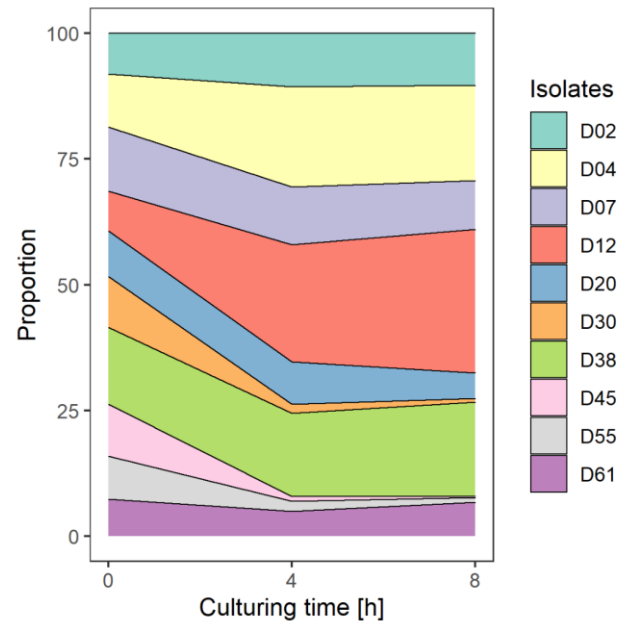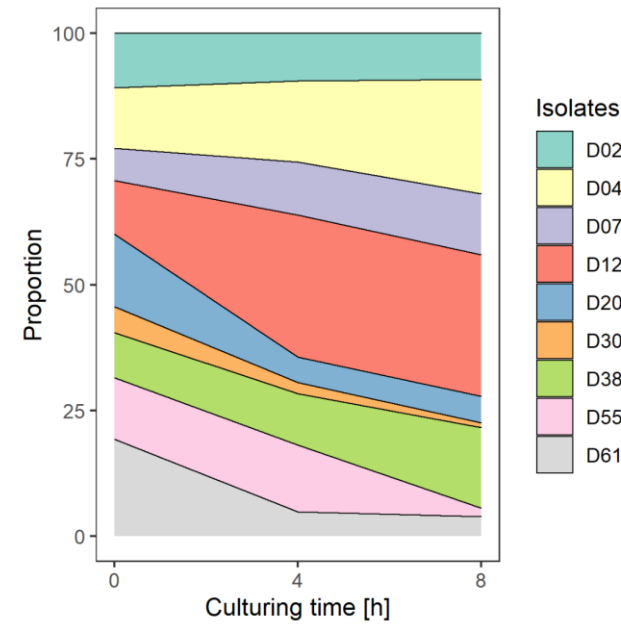

# Course E

## human

1<sup>st</sup> replicate

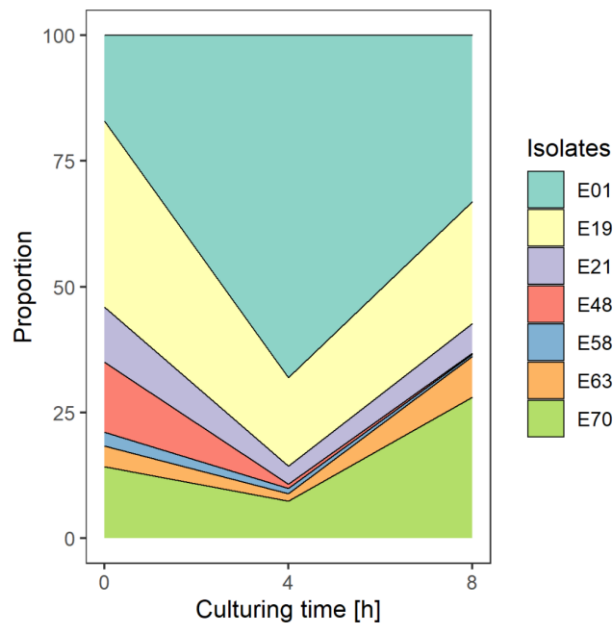

## murine

1<sup>st</sup> replicate

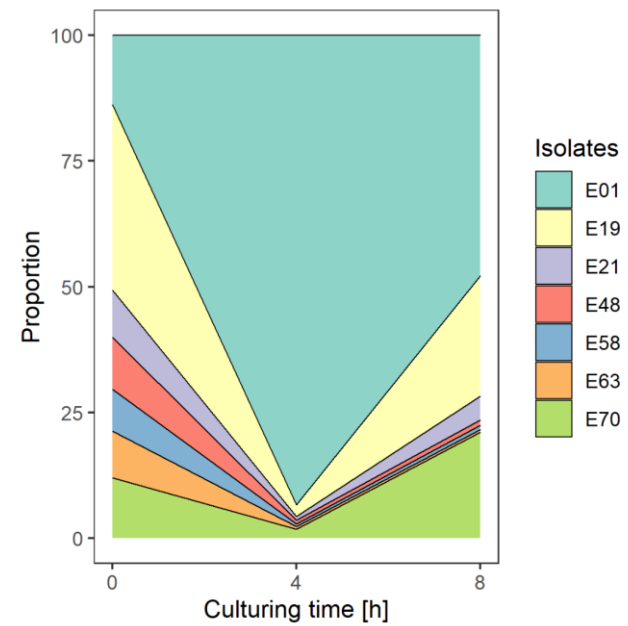

2<sup>nd</sup> replicate

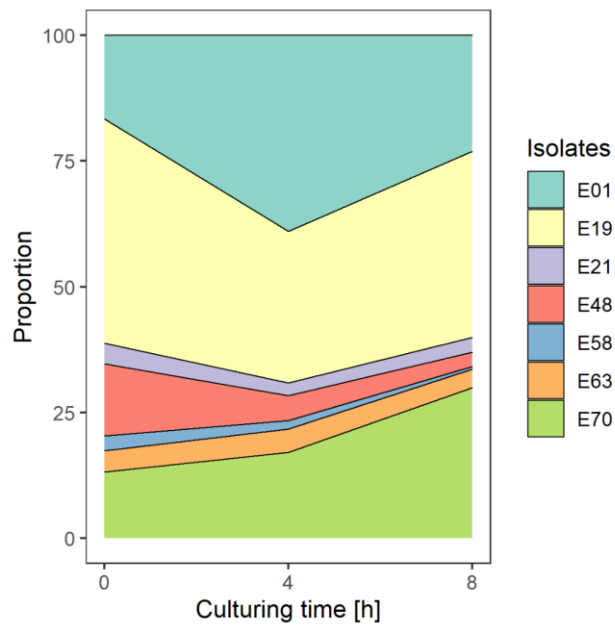

2<sup>nd</sup> replicate

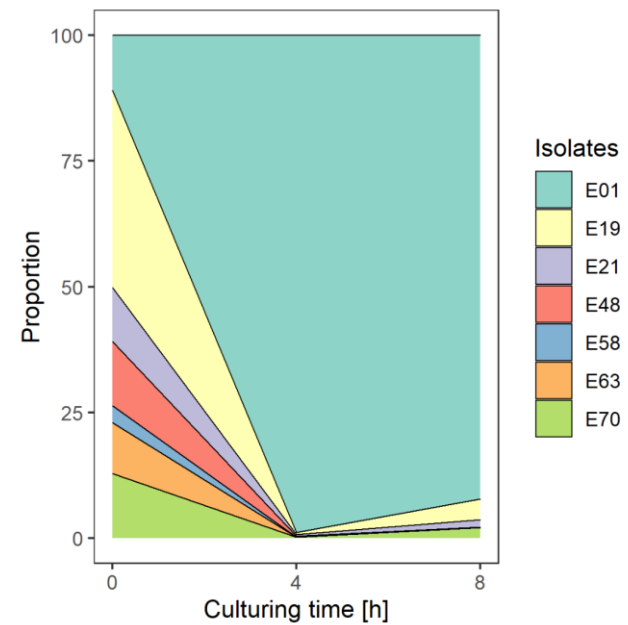

# Course F

## human

1<sup>st</sup> replicate

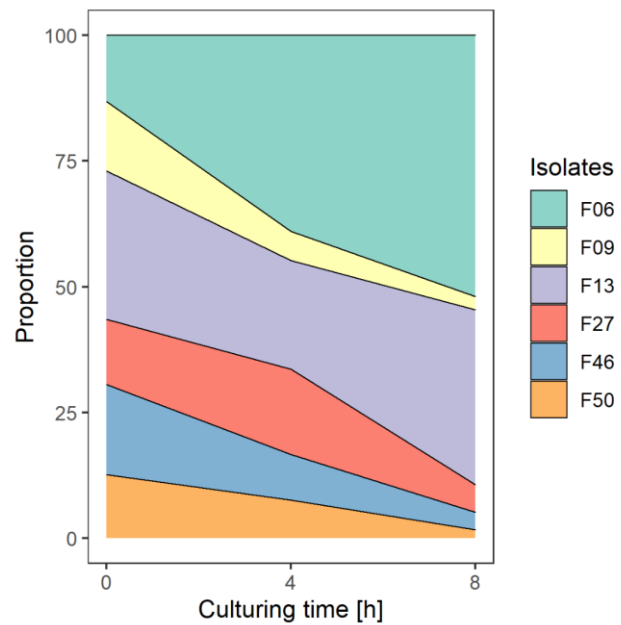

## murine

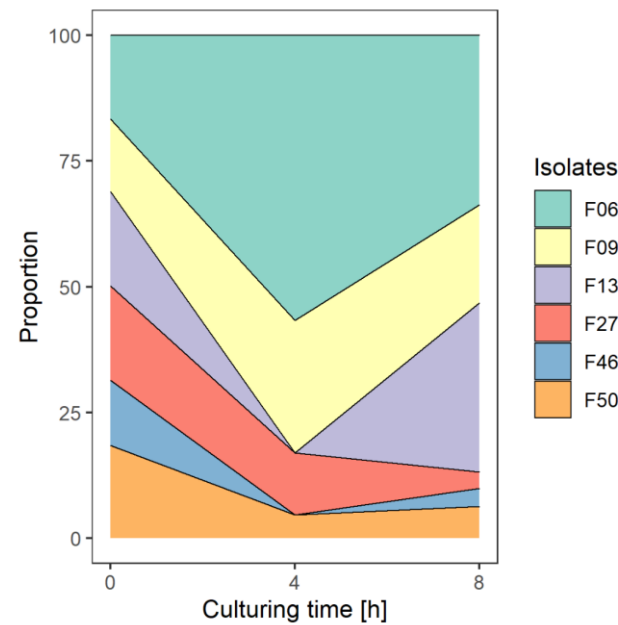

2<sup>nd</sup> replicate

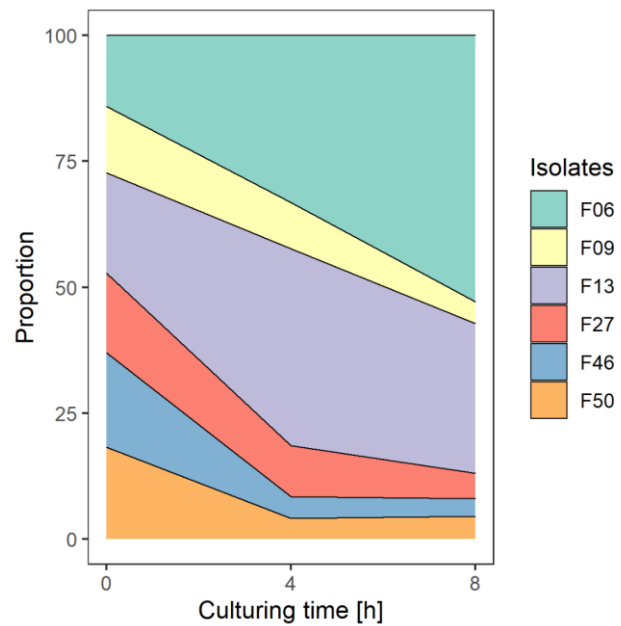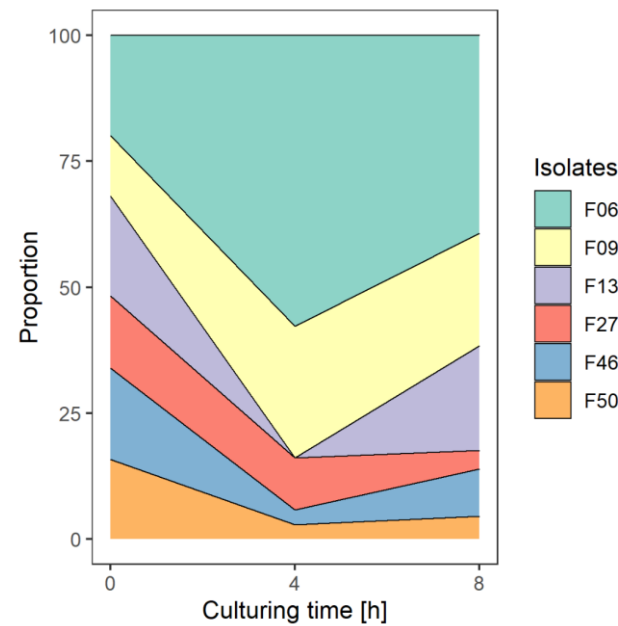

# Course G

## human

1<sup>st</sup> replicate

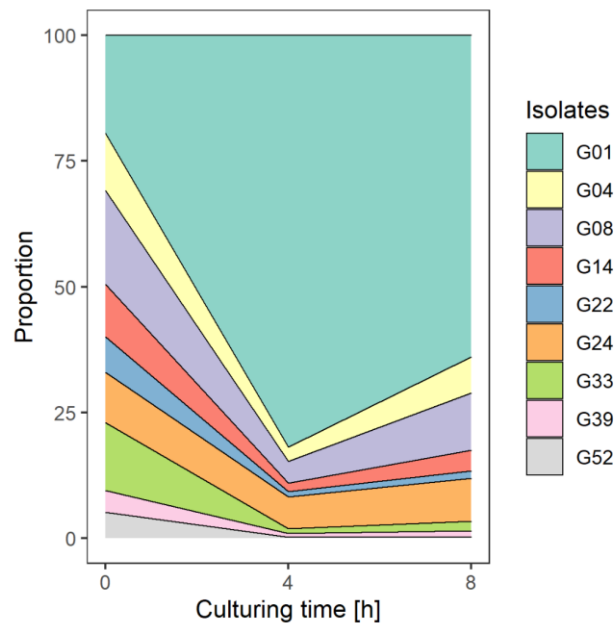

## murine

1<sup>st</sup> replicate

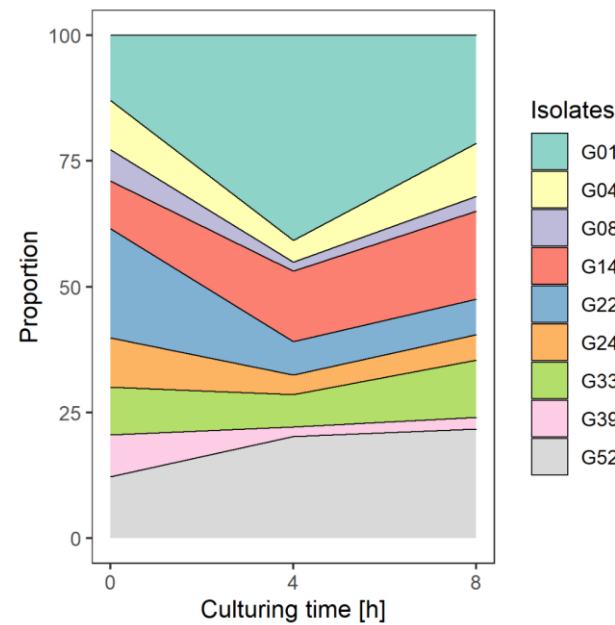

2<sup>nd</sup> replicate

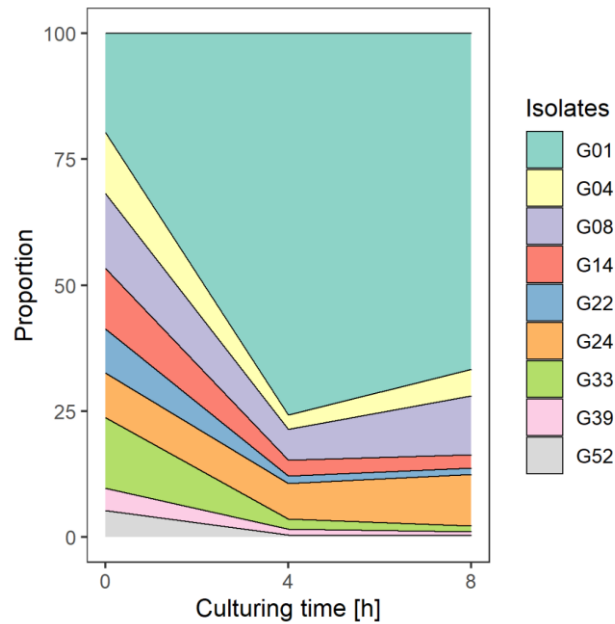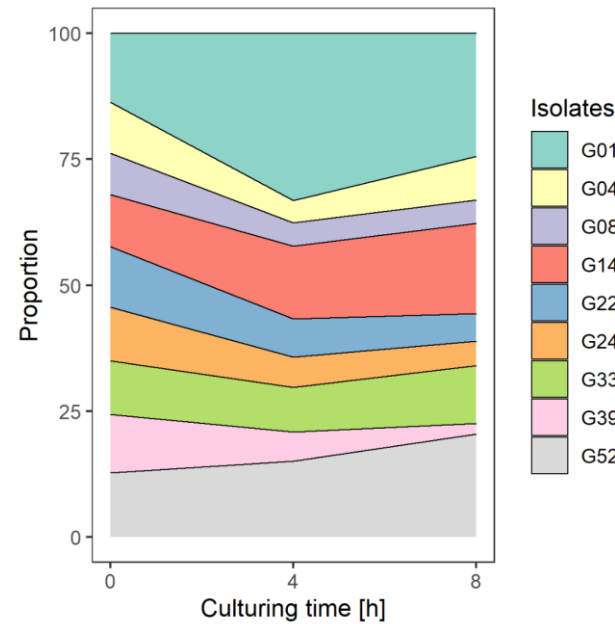

Course H

human

murine

1<sup>st</sup> replicate

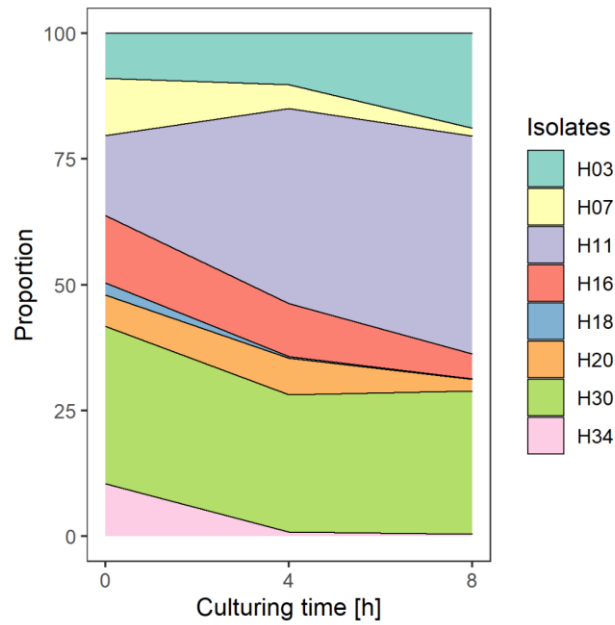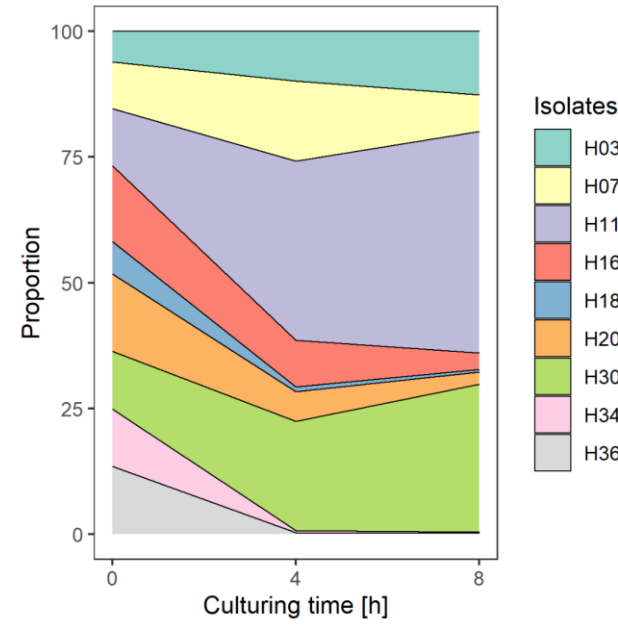

2<sup>nd</sup> replicate

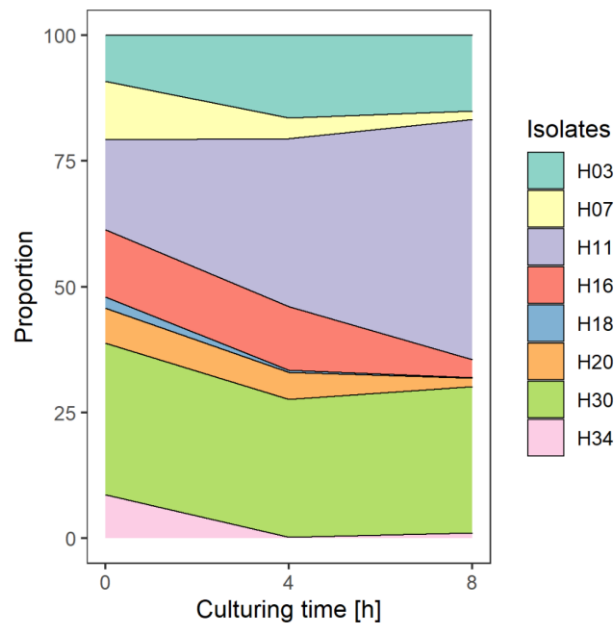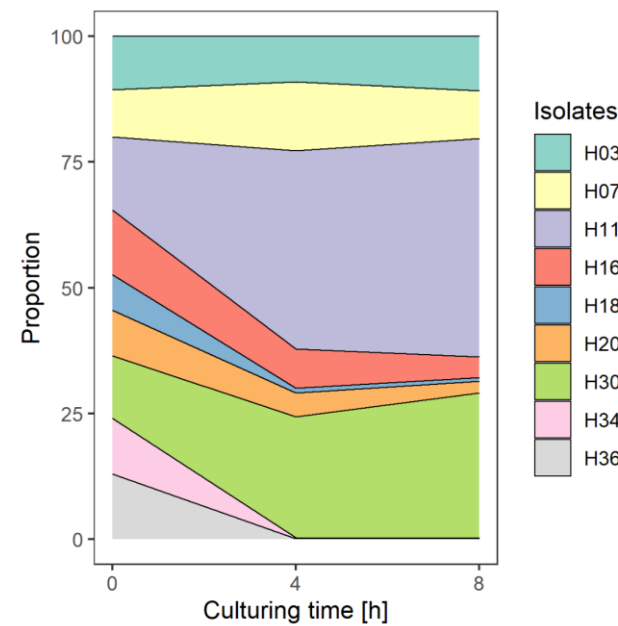

Course K

human

murine

1<sup>st</sup> replicate

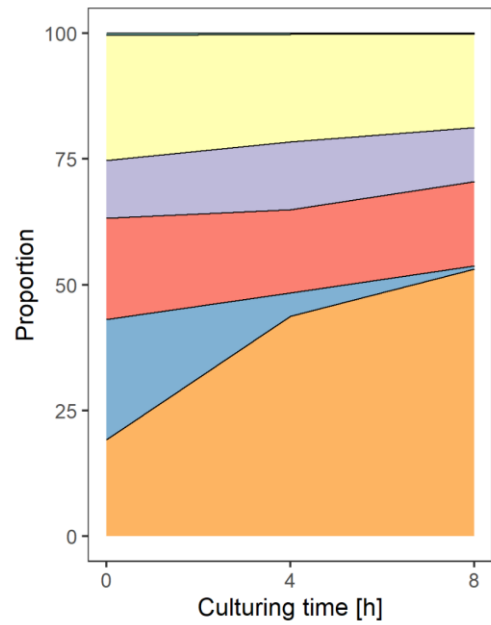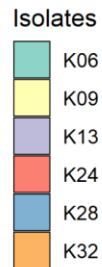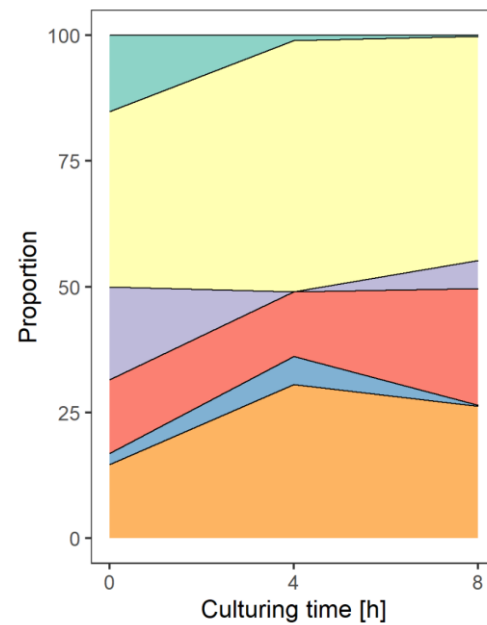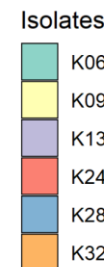

2<sup>nd</sup> replicate

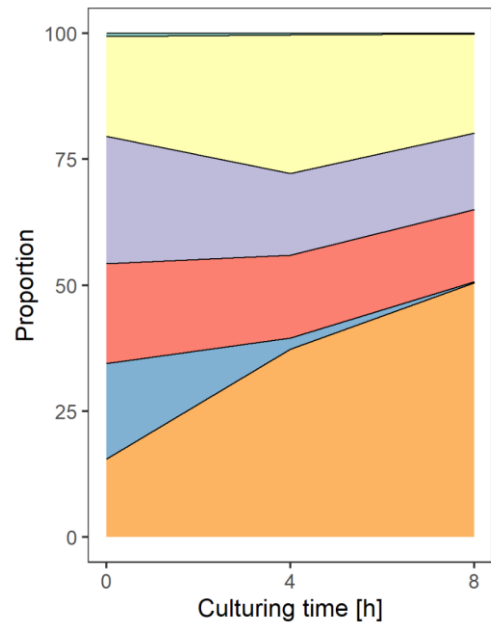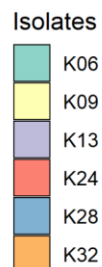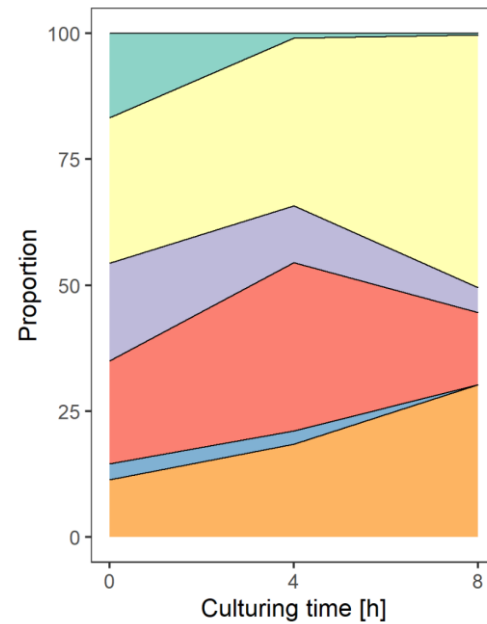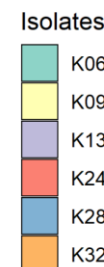



Course L

human

murine

1<sup>st</sup> replicate

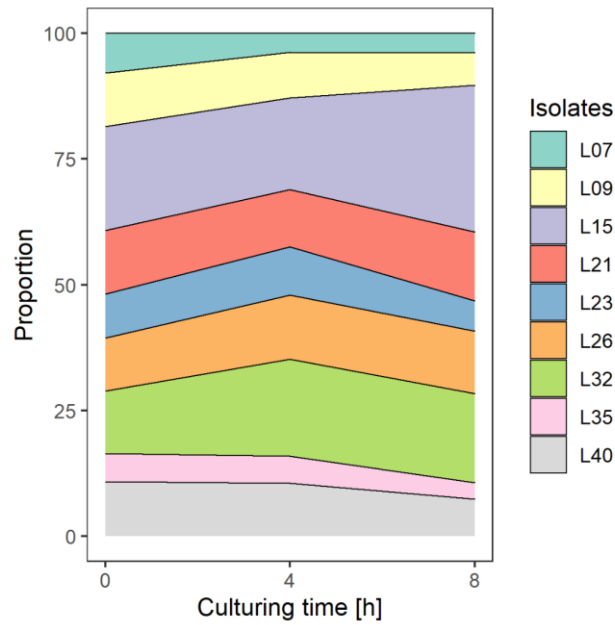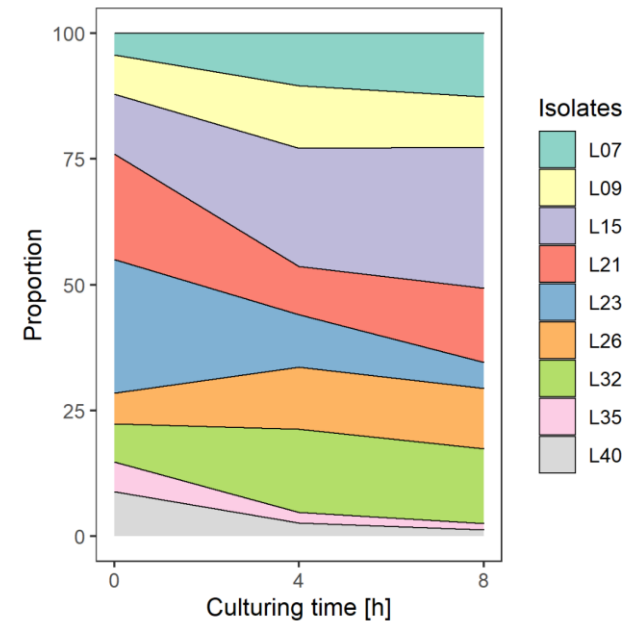

2<sup>nd</sup> replicate

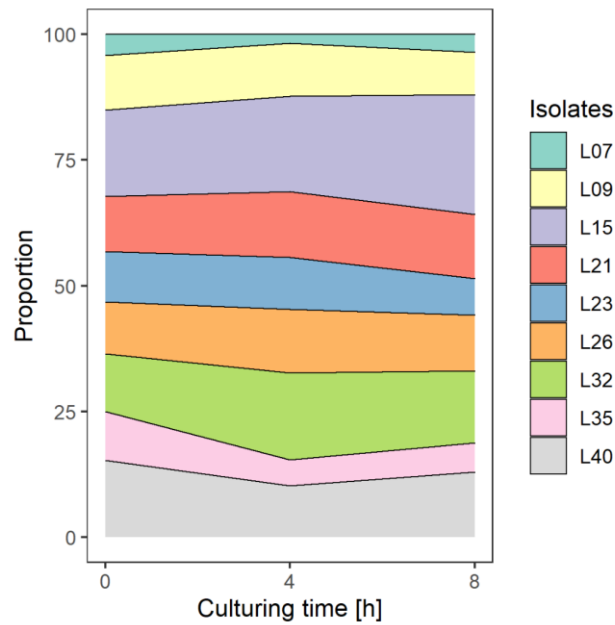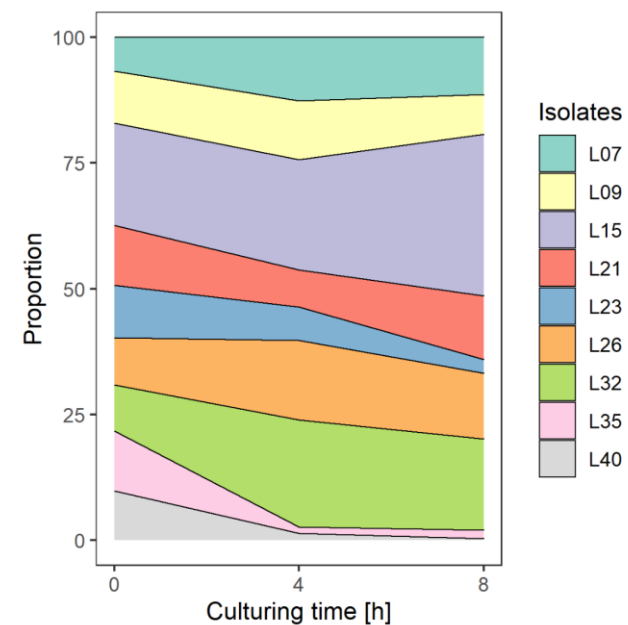

# Course M

## human

1<sup>st</sup> replicate

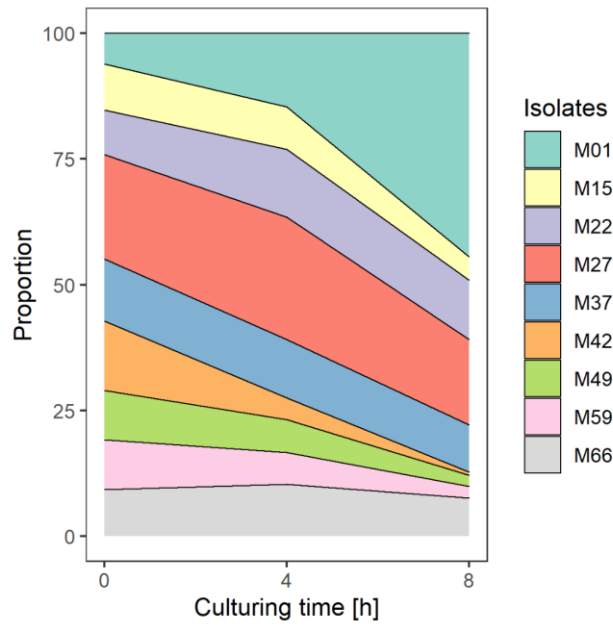

## murine

1<sup>st</sup> replicate

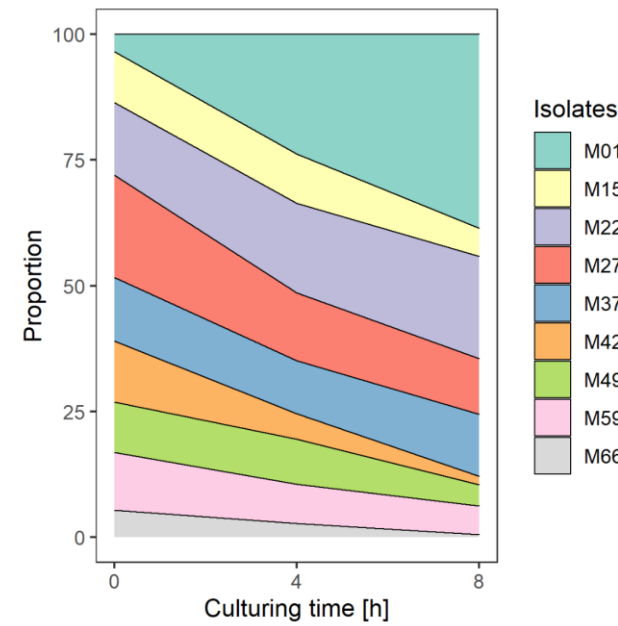

2<sup>nd</sup> replicate

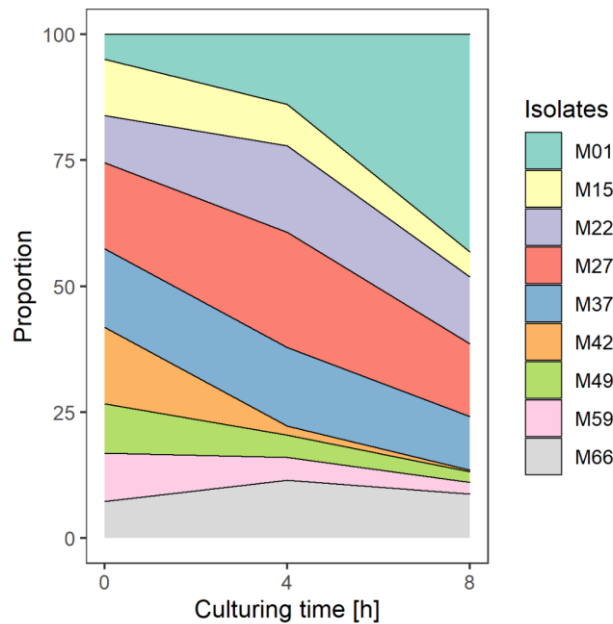

2<sup>nd</sup> replicate

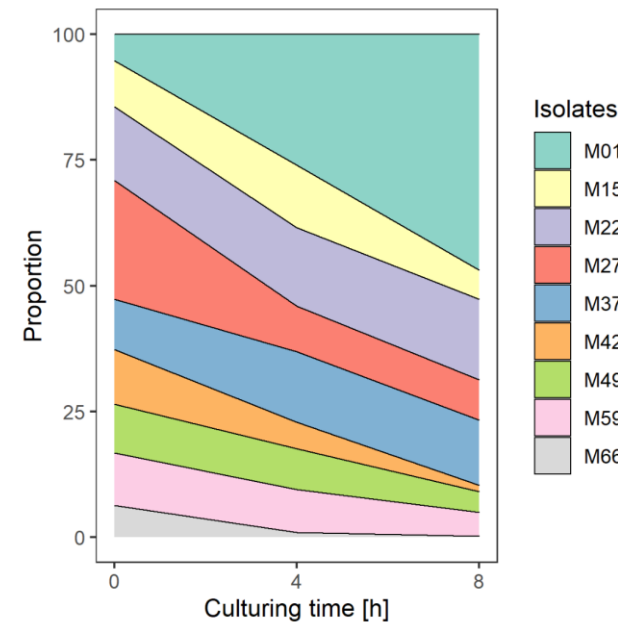

Course N

human

murine

1<sup>st</sup> replicate

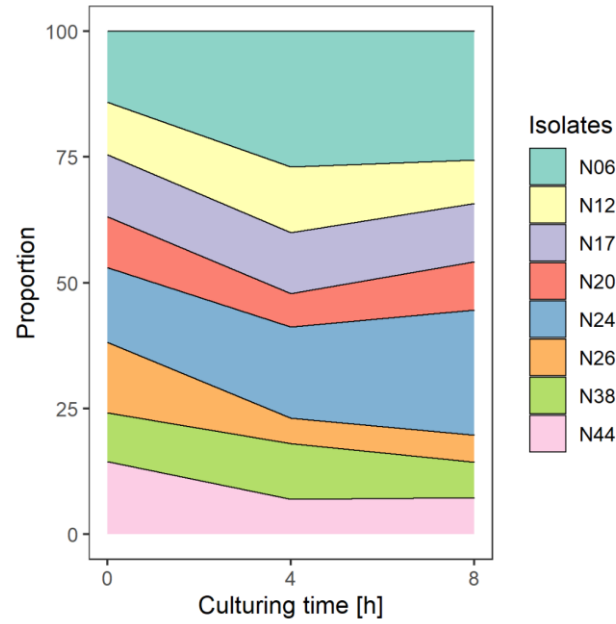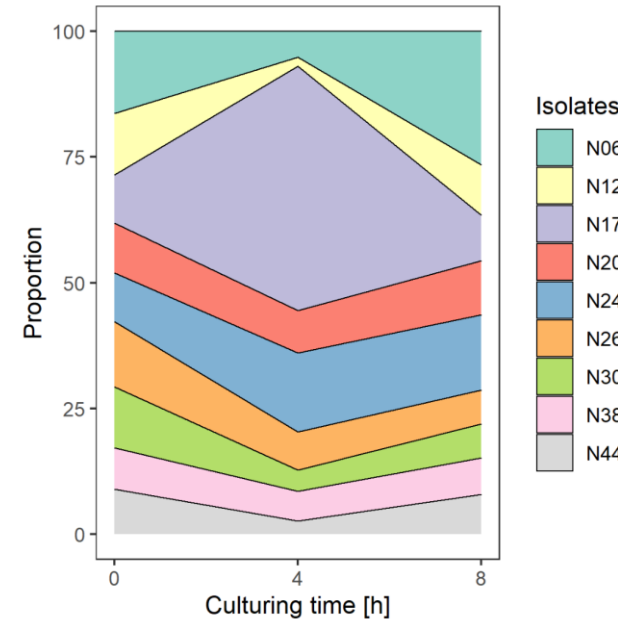

2<sup>nd</sup> replicate

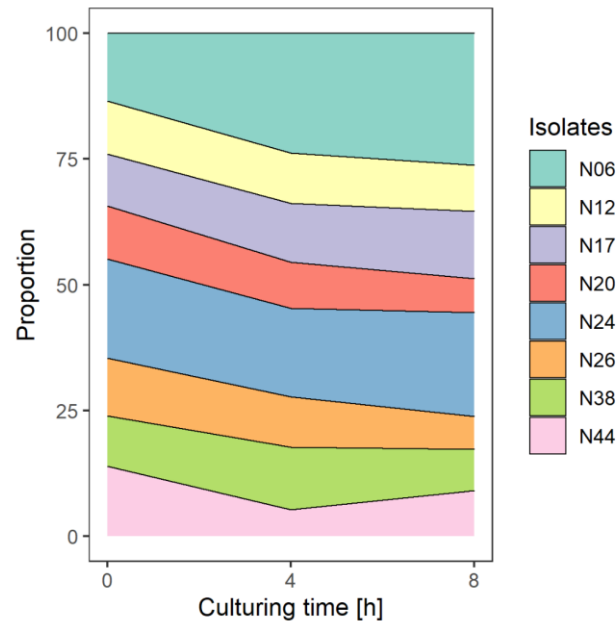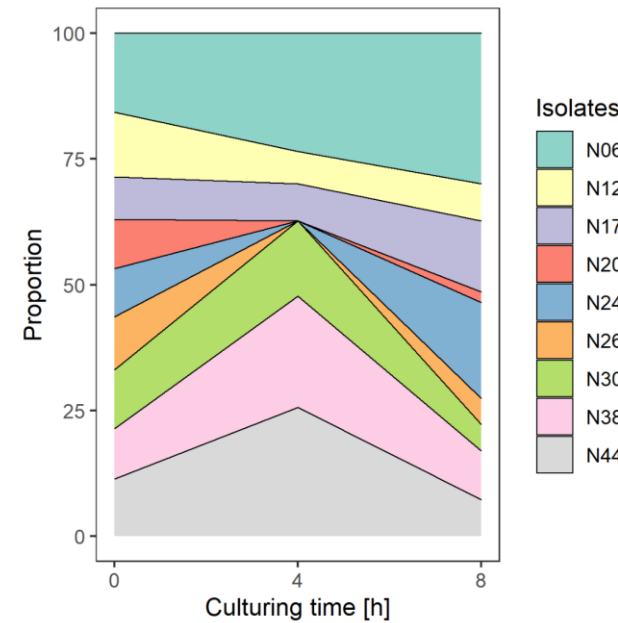

Supplement: DataSheet_1.pdf [file DataSheet_1.pdf]
